# Supplementary material
Source: PubMed Central journal article supplement (PMC7807750)
Supplement: ao0c05075_si_001.pdf [file ao0c05075_si_001.pdf]

## Supporting Information

### New Alkyne and Amine Linkers for Versatile Multiple Conjugation of Oligonucleotides

Dmytro Honcharenko<sup>†, #, \*</sup>, Kristina Druceikaite<sup>†, §, #</sup>, Malgorzata Honcharenko<sup>†</sup>, Martin Bollmark<sup>§</sup>, Ulf Tedebark<sup>§</sup>, and Roger Strömberg<sup>†</sup>

<sup>†</sup> Department of Biosciences and Nutrition, Karolinska Institutet, SE-14183 Huddinge, Sweden

<sup>§</sup> RISE Chemical Process and Pharmaceutical Development, Forskargatan 20J, 15136 Södertälje, Sweden

#### CONTENTS:

|                                                                                                                                                                   |         |
|-------------------------------------------------------------------------------------------------------------------------------------------------------------------|---------|
| Experimental details for the synthesis of compounds <b>2</b> , <b>13</b> , and BG-N <sub>3</sub> (SNAP-Tag azide).....                                            | S2-S3   |
| <b>Figure S1-S6.</b> <sup>13</sup> C APT and <sup>13</sup> C NMR spectra of compounds <b>3</b> , <b>4</b> , <b>6</b> , <b>9</b> , <b>10</b> , and <b>15</b> ..... | S4-S9   |
| <b>Figure S7-S9.</b> <sup>31</sup> P NMR spectra of compounds <b>7</b> , <b>11</b> and <b>16</b> .....                                                            | S10-S12 |
| <b>Figure S10.</b> <sup>1</sup> H NMR spectrum of BG-N <sub>3</sub> .....                                                                                         | S13     |
| <b>Figure S11.</b> ESI-TOF mass spectrum of compound BG-N <sub>3</sub> .....                                                                                      | S14     |
| <b>Figure S12-S24.</b> ESI-TOF mass spectra of ONs1-6 and ON conjugates reported in Table 1.....                                                                  | S15-S27 |
| <b>Figure S25-S38.</b> RP-HPLC profiles of ONs and their conjugates.....                                                                                          | S28-S41 |
| <b>Table S1.</b> Yields of ON conjugation and the total yields of ON conjugates.....                                                                              | S42     |

**(R)-5-Aminopentane-1,3-diol (2)** LiAlH<sub>4</sub> pellets (26.9 g, 708.8 mmol) were suspended in THF (557 ml). A solution of compound **1** (55.7 g, 354.4 mmol) in THF (278.5 mL) was added dropwise to the LiAlH<sub>4</sub> at room temperature. The reaction mixture was heated to 70 °C and left to stir for 6 h. Then reaction was chilled to 0 °C and Fieser work-up procedure (dropwise addition of water and NaOH solution followed by water) was done. The solids were removed by filtration, washed with 2-propanol, and the filtrate was concentrated *in vacuo*. The aminodiol **2** recovered (38.5 g, 323.1 mmol, 91%) was used for further steps without additional purification. <sup>1</sup>H NMR and <sup>13</sup>C NMR were consistent with literature data.

**4-[(9H-Fluoren-9-yl-methoxycarbonylamino)methyl]benzoic acid (13):** To a solution of p-aminomethyl benzoic acid (10 g, 66.15 mmol) and Fmoc-OSu (24.55 g, 72.78 mmol) in THF (200 mL) 10% NaHCO<sub>3</sub> aqueous solution (200 mL) was added. The reaction mixture was stirred at room temperature for 4 h. The THF was removed under reduced pressure and water/ethyl acetate work-up was performed. The aqueous solution was acidified with 1 N HCl, the reaction mixture was filtered, and the residue was washed with ethyl acetate and water. The solid residue was dried under vacuum to give **13** (21.76 g, 88%) as a white powder. <sup>1</sup>H NMR and <sup>13</sup>C NMR found to be consistent with the literature data (Kim, M. H., et al., Simple methods for tracking stem cells with <sup>64</sup>Cu-labeled DOTA-hexadecyl-benzoate. *ACS Med. Chem. Lett.*, 2015, 6, 528–530).

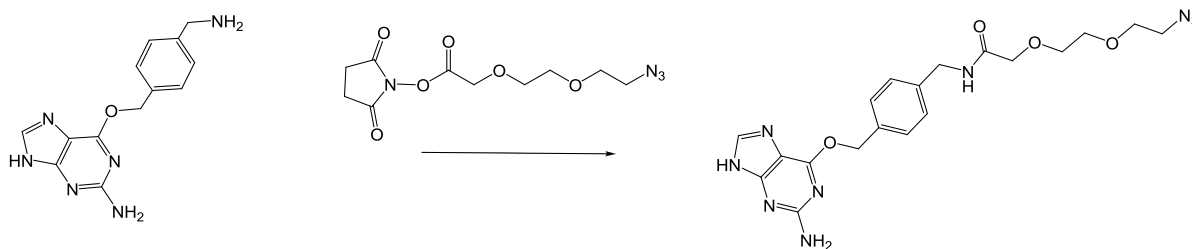

Scheme S1. Synthesis of *N*-(4-(((2-amino-9*H*-purin-6-yl)oxy)methyl)benzyl)-2-(2-(2-azidoethoxy)ethoxy)-acetamide (BG-N<sub>3</sub>, SNAP-Tag azide).

***N*-(4-(((2-Amino-9*H*-purin-6-yl)oxy)methyl)benzyl)-2-(2-(2-azidoethoxy)ethoxy)-acetamide (BG-N<sub>3</sub>, SNAP-Tag azide).** The 6-(((4-(aminomethyl)benzyl)oxy)-9*H*-purin-2-amine (SNAP-Tag) (112.4 mg, 0.417 mmol) was dissolved in 5 ml of acetone/water (1:1 v/v) whereupon 125 mg (0.437 mmol, 1.05 equiv.) 2,5-dioxopyrrolidin-1-yl 2-(2-(2-azidoethoxy)ethoxy)acetate (2-[2-(2-azidoethoxy)ethoxy]acetic acid hydroxysuccinimide ester) was added followed by 87  $\mu$ l of triethylamine (63 mg, 1.5 equiv.). Reaction was stirred overnight at room temperature. After evaporation of solvent, the crude product was subjected to silica gel flash column chromatography using dichloromethane-methanol mixture (9:1 v/v) as eluent to obtain product BG-N<sub>3</sub> (102 mg, 55% yield). <sup>1</sup>H NMR (400.1 MHz, CDCl<sub>3</sub> plus CD<sub>3</sub>OD):  $\delta$  = 7.68 (s, 1H), 7.36 (d, *J* = 8.02 Hz, 2H), 7.20 (d, *J* = 8.02 Hz, 2H), 5.42 (s, 2H), 4.35 (s, 2H), 3.95 (s, 2H), 3.62-3.52 (m, 4H), 3.48 (t, *J* = 4.80 Hz, 2H), 3.15 (t, *J* = 4.80 Hz, 2H) ppm. ES-MS calcd. for C<sub>19</sub>H<sub>24</sub>N<sub>9</sub>O<sub>4</sub> [M + H]<sup>+</sup> 442.19, found 442.18.

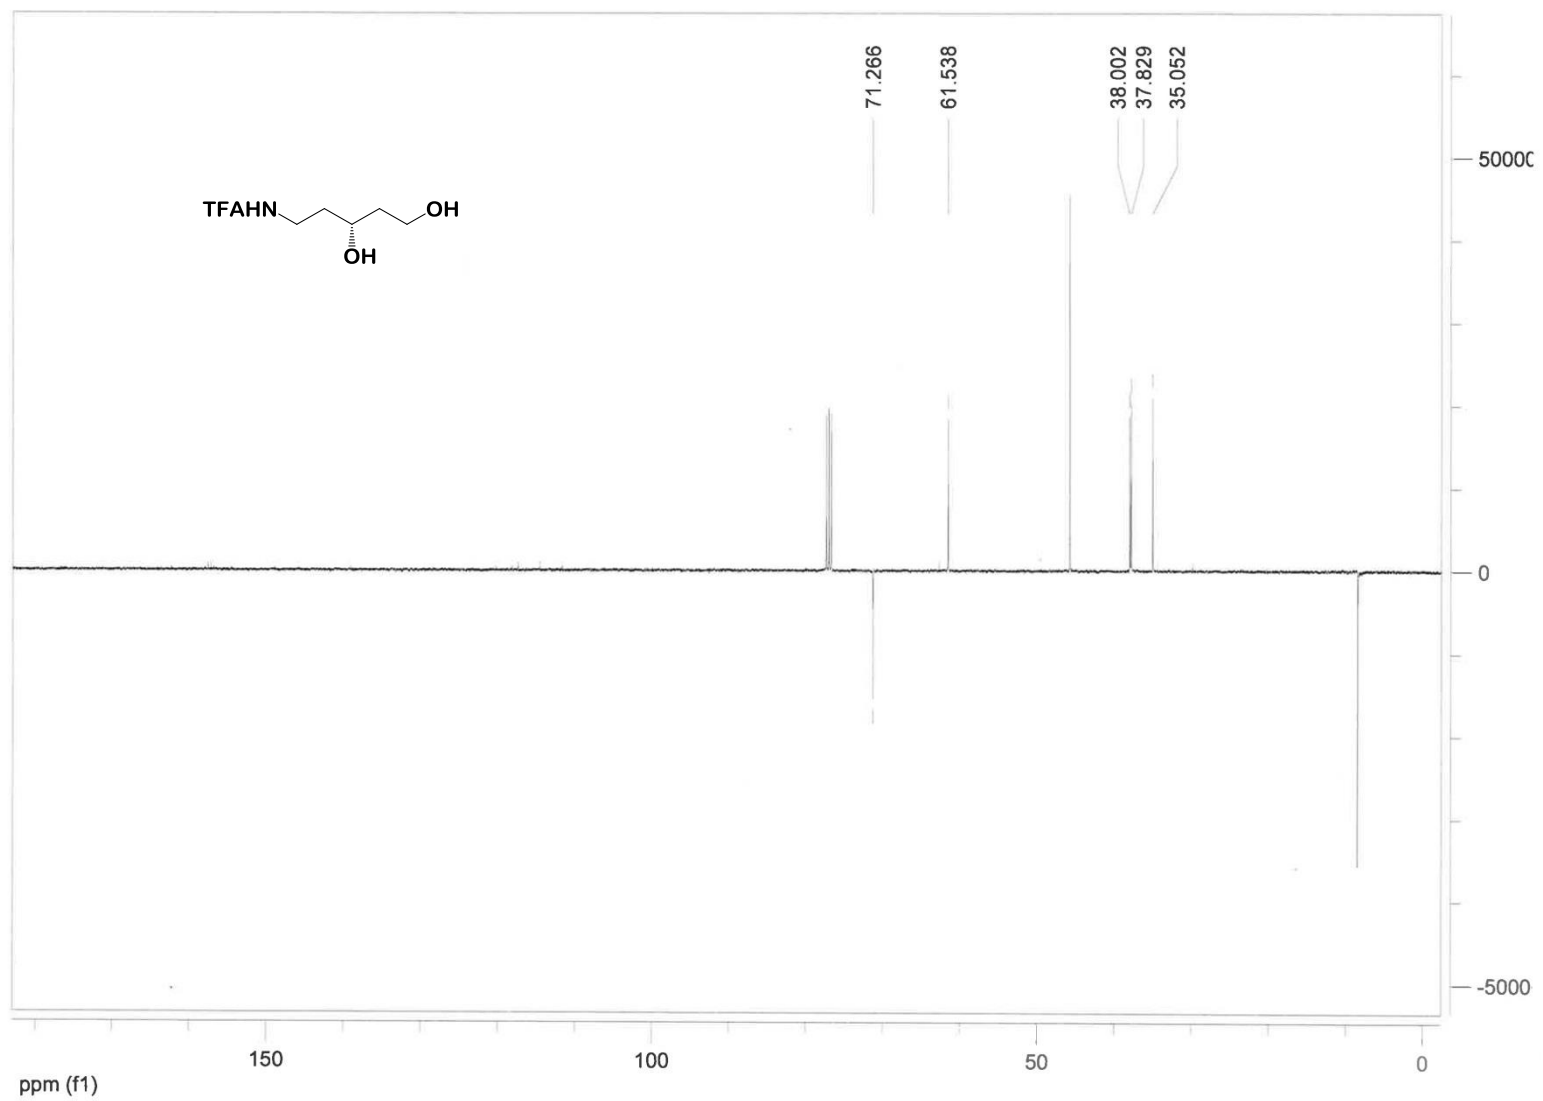

Figure S1.  $^{13}\text{C}$  APT NMR spectrum of compound **3** (CDCl<sub>3</sub>, 100.6 MHz).

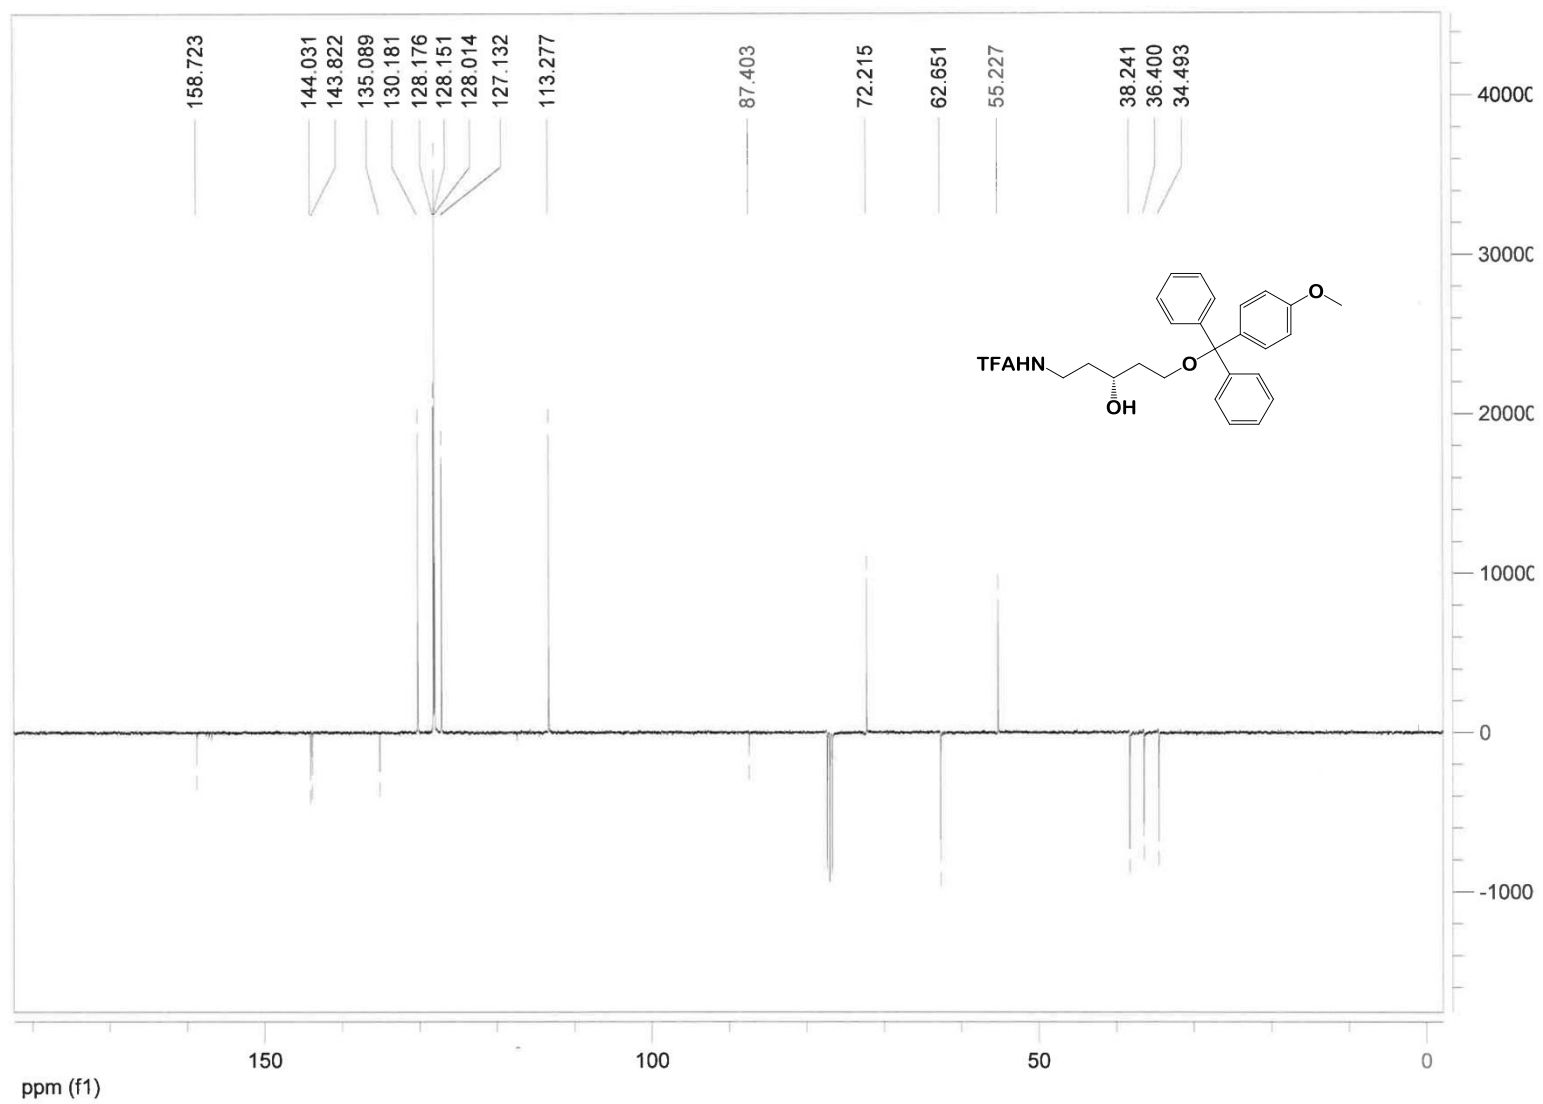

Figure S2.  $^{13}\text{C}$  APT NMR spectrum of compound **4** ( $\text{CDCl}_3$ , 100.6 MHz).

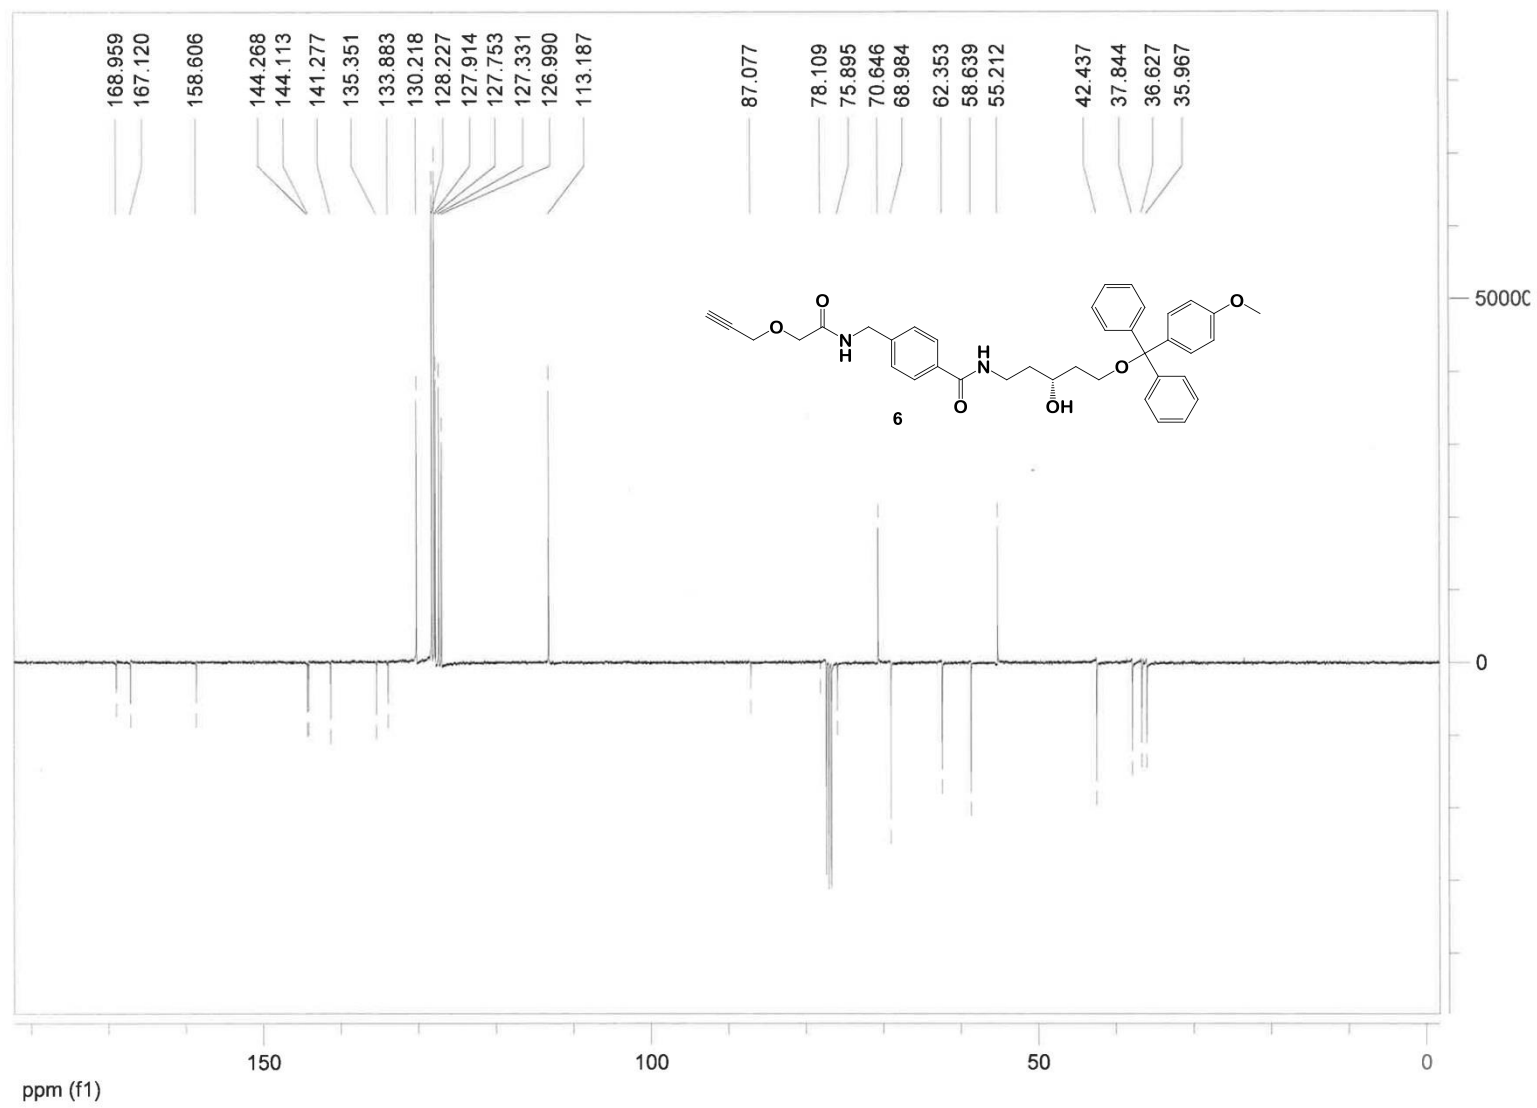

Figure S3.  $^{13}\text{C}$  APT NMR spectrum of compound **6** ( $\text{CDCl}_3$ , 100.6 MHz).

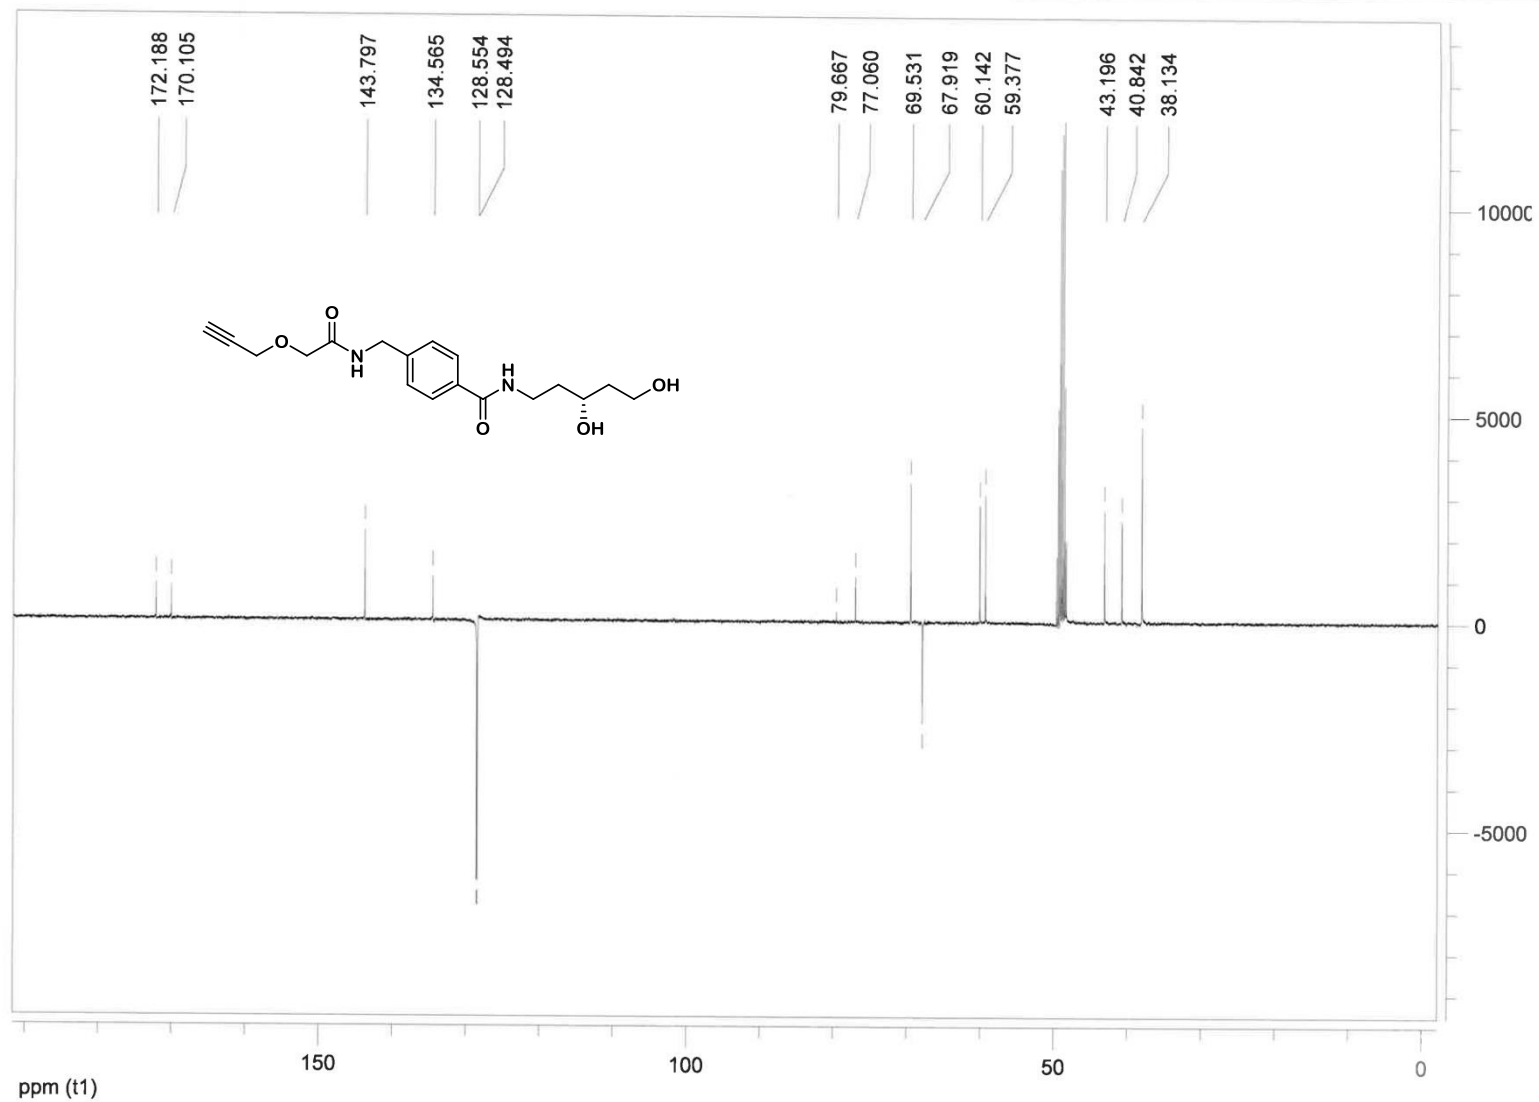

Figure S4. <sup>13</sup>C APT NMR spectrum of compound **9** (CD<sub>3</sub>OD, 100.6 MHz).

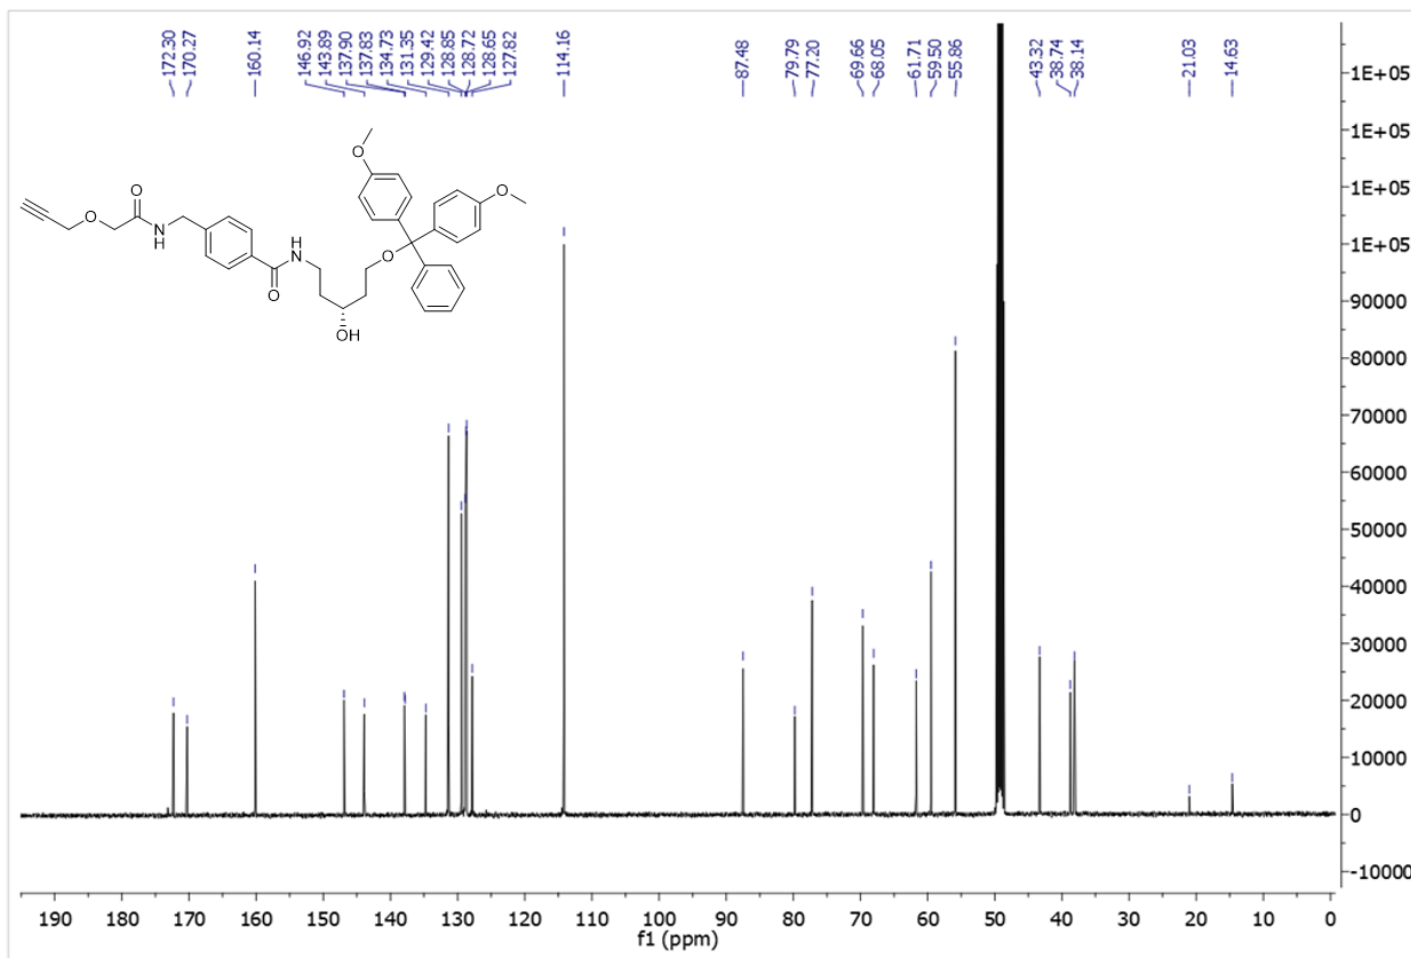

Figure S5.  $^{13}\text{C}$  NMR spectrum of compound **10** ( $\text{CD}_3\text{OD}$ , 125.76 MHz).



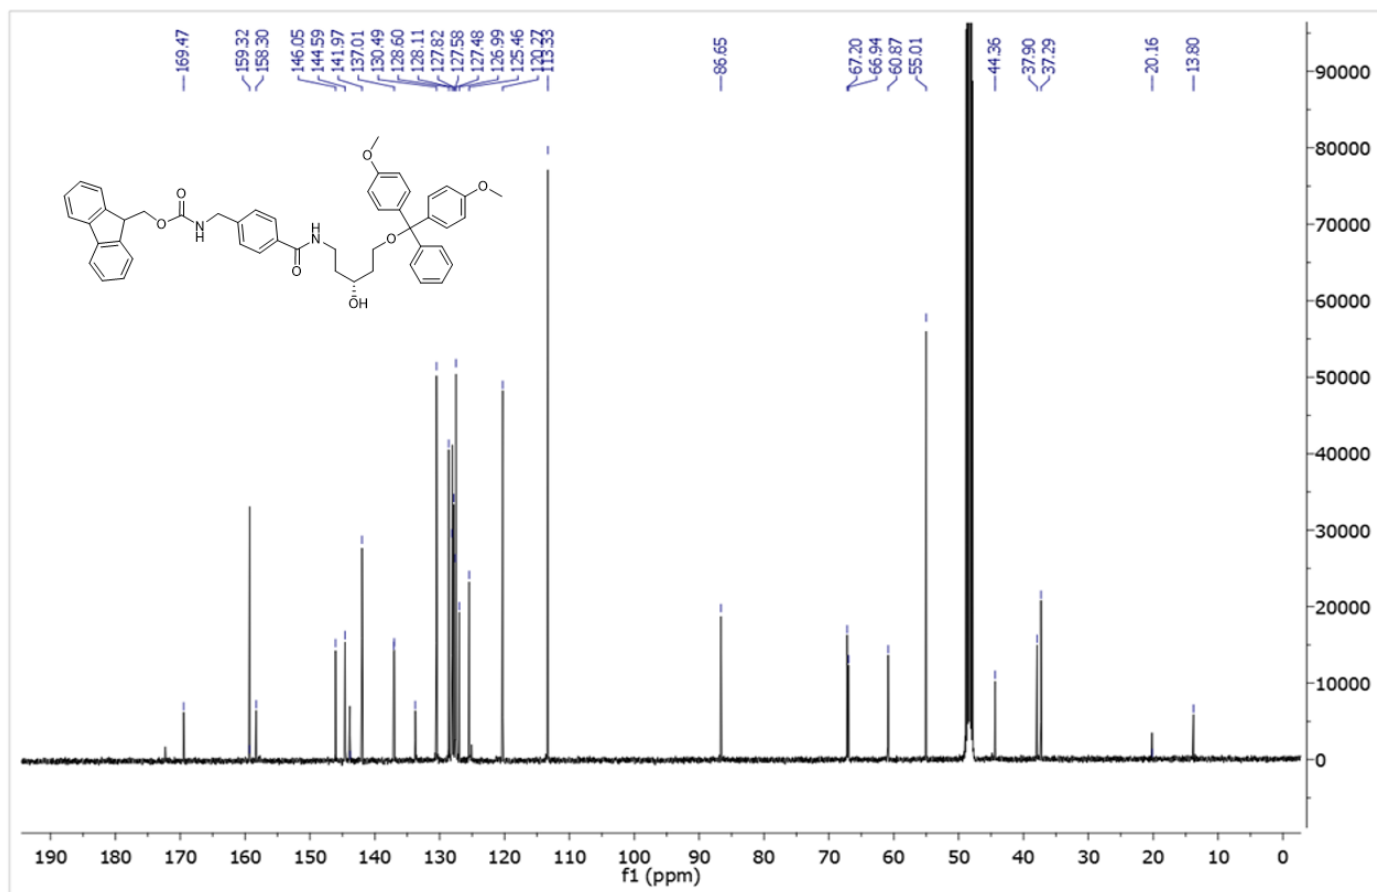

Figure S6.  $^{13}\text{C}$  NMR spectrum of compound **15** ( $\text{CD}_3\text{OD}$ , 125.76 MHz).

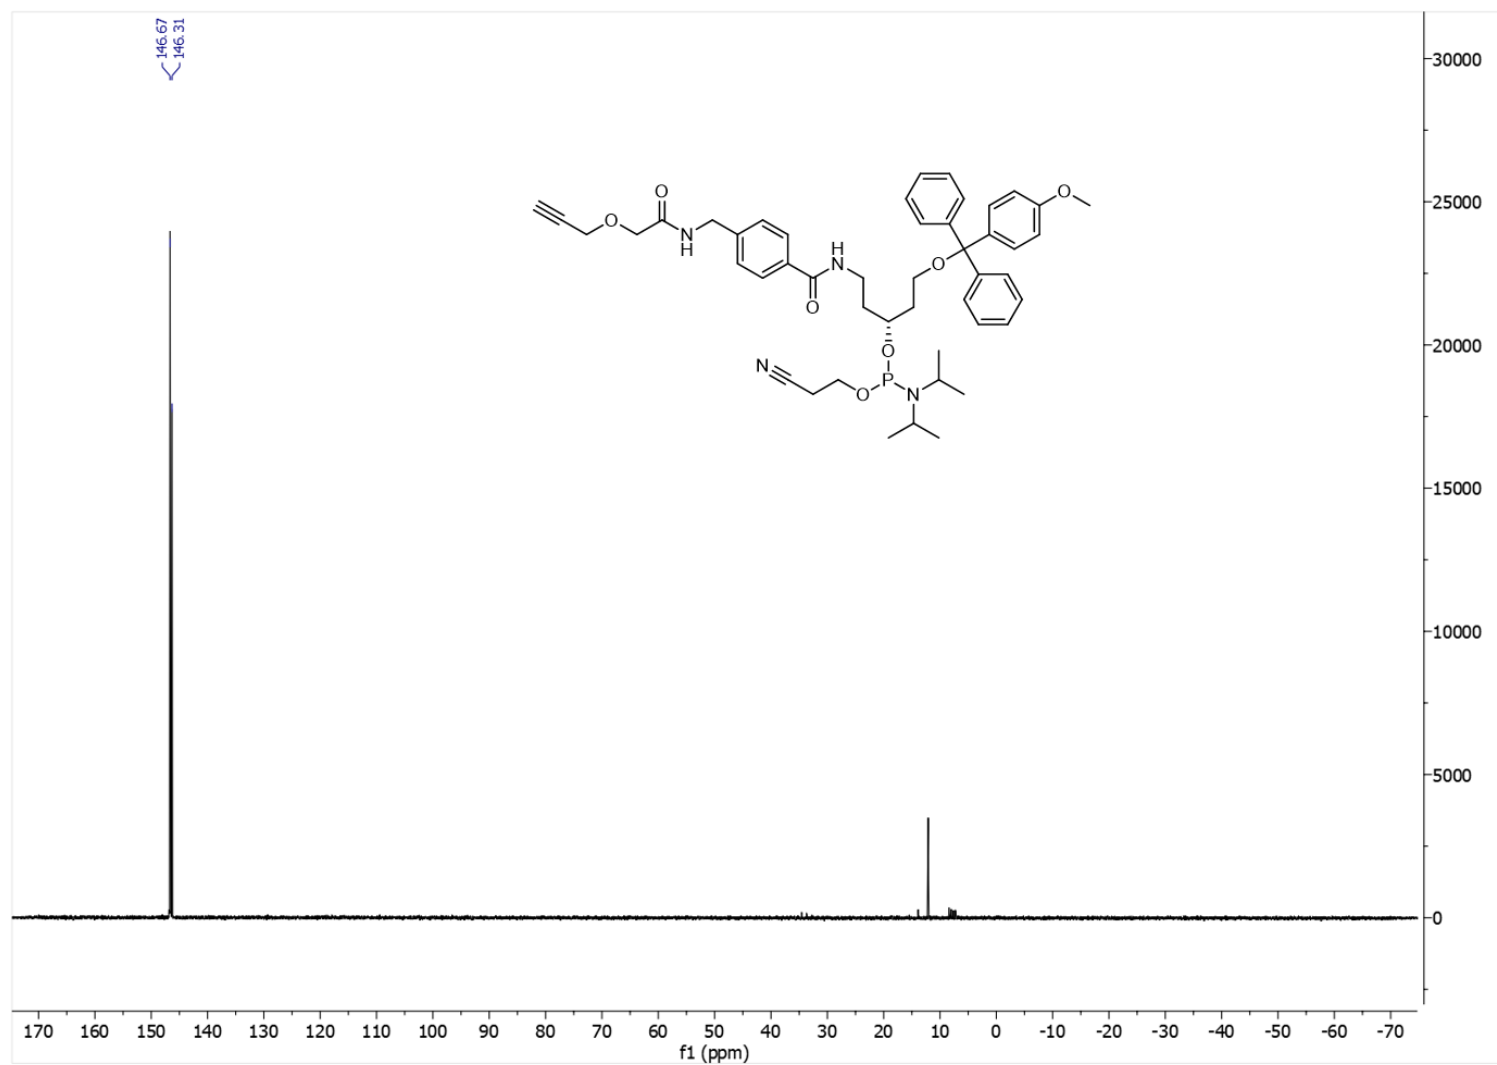

Figure S7.  $^{31}\text{P}$  NMR spectrum of compound **7** ( $\text{DMSO-d}_6$ , 202.47 MHz).

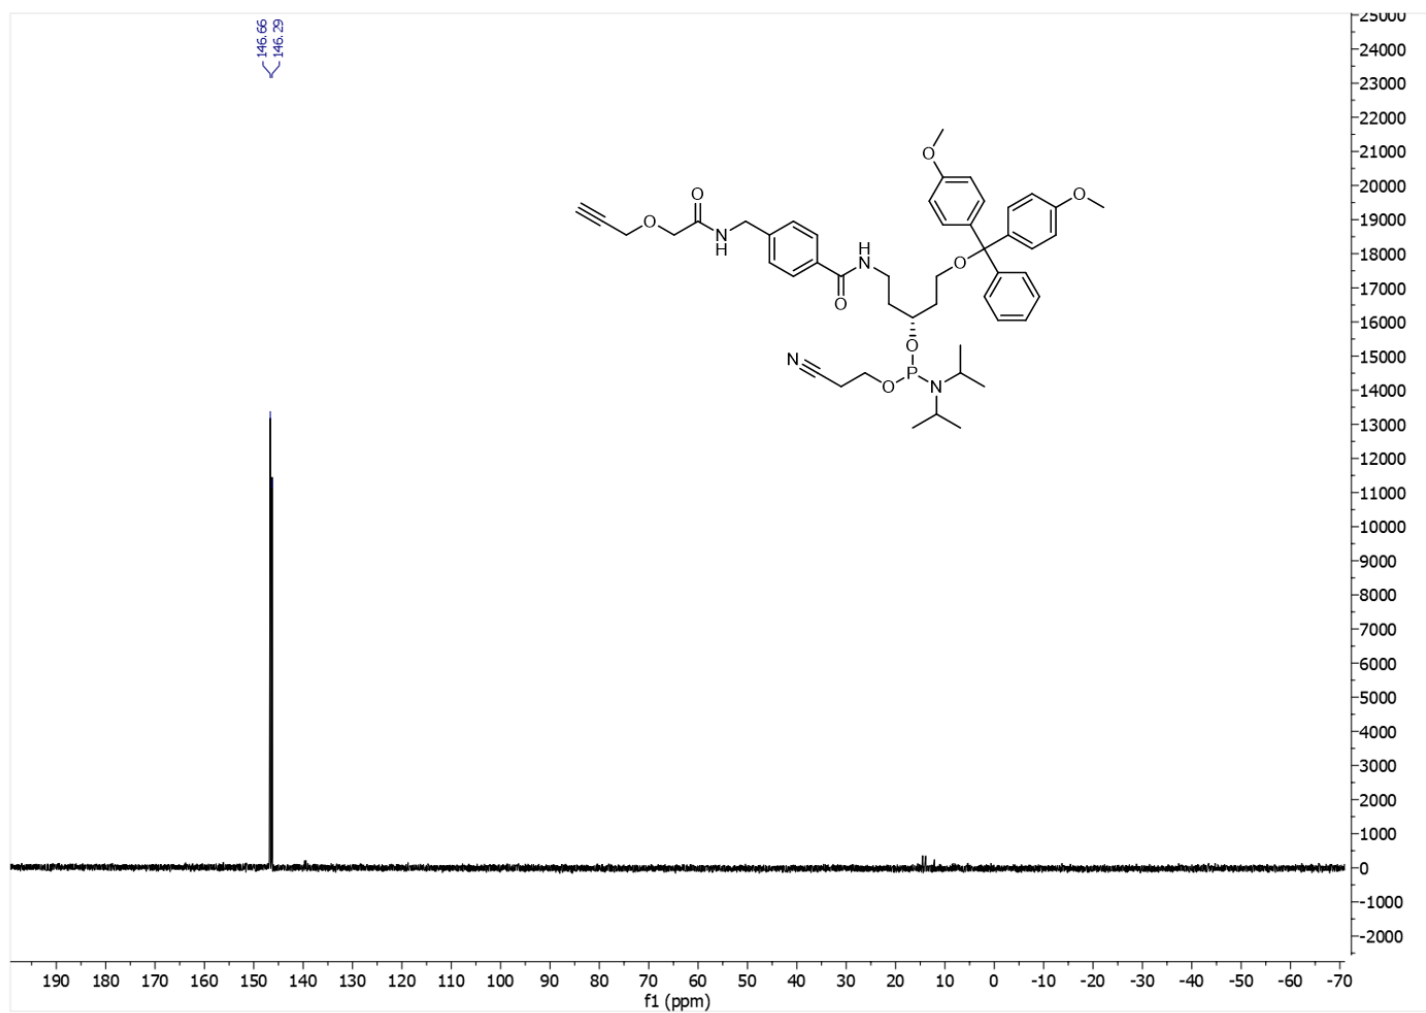

Figure S8.  $^{31}\text{P}$  NMR spectrum of compound **11** (DMSO- $d_6$ , 202.47 MHz).

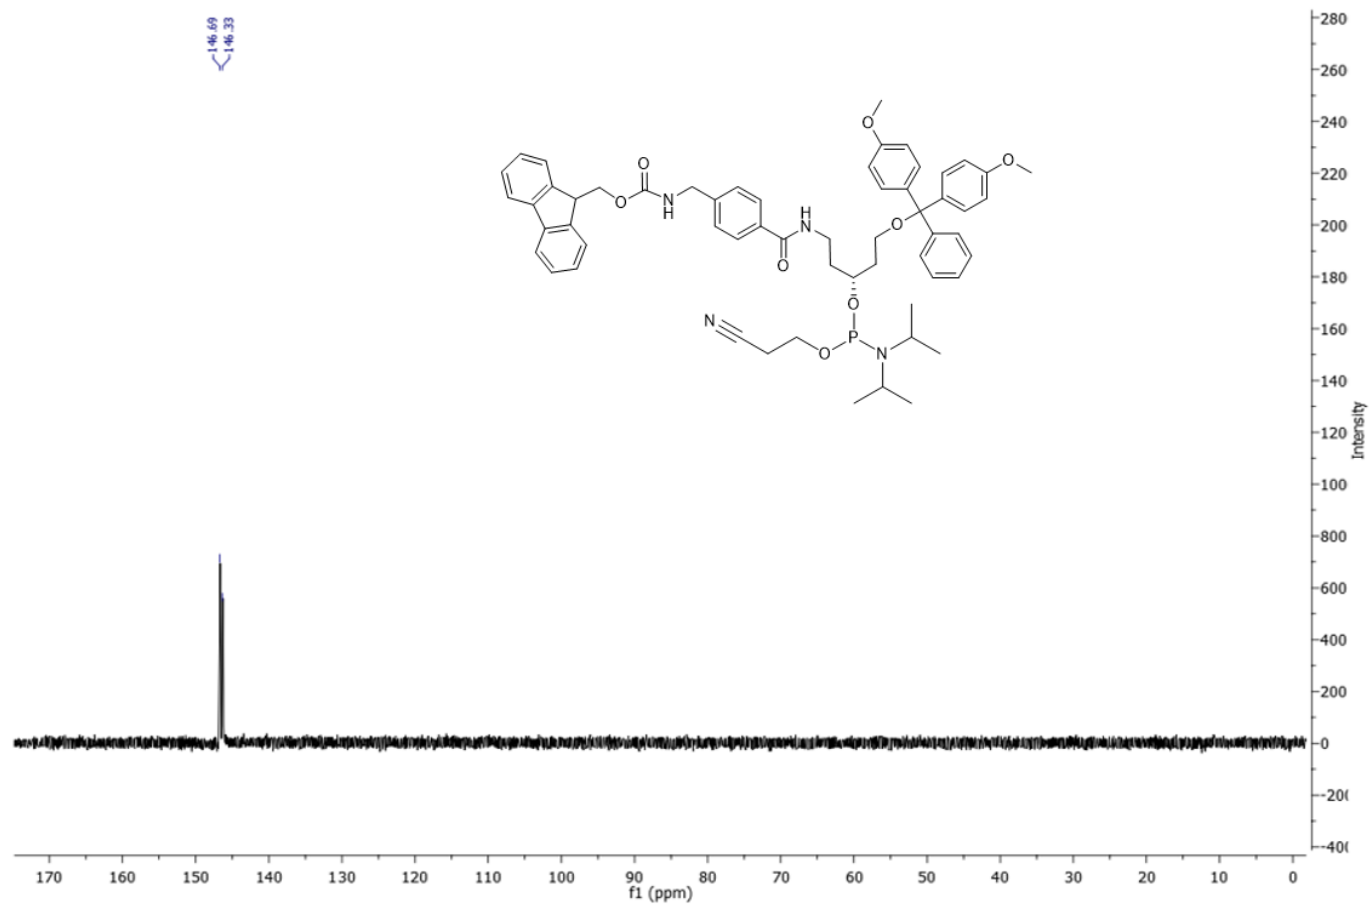

Figure S9.  $^{31}\text{P}$  NMR spectrum of compound **16** ( $\text{DMSO-d}_6$ , 202.47 MHz).

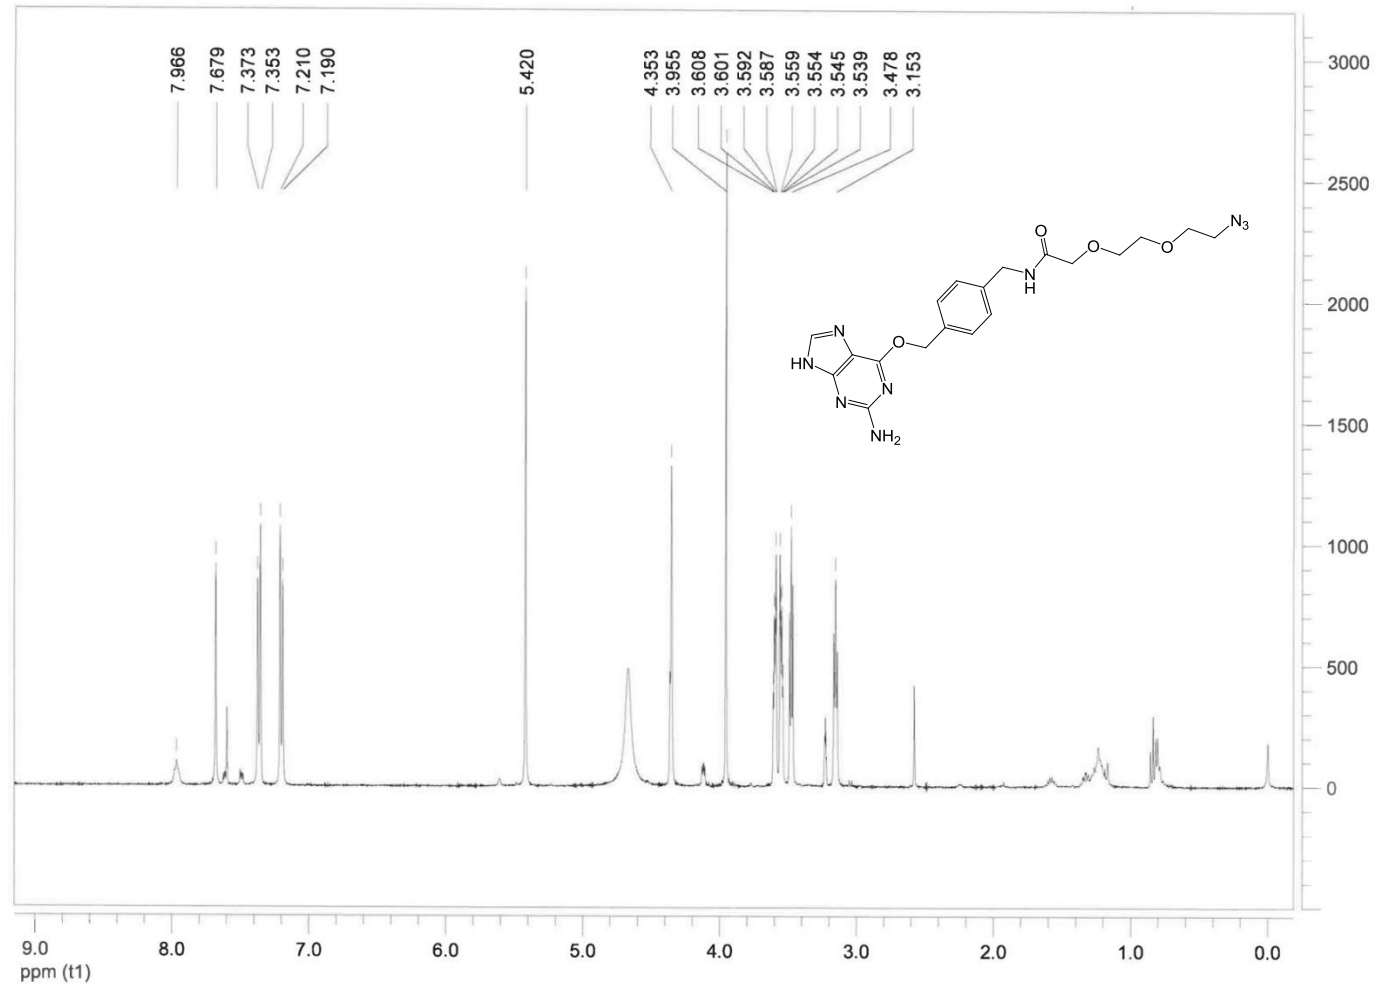

Figure S10. <sup>1</sup>H NMR spectrum of BG-N<sub>3</sub> (400.1 MHz, CDCl<sub>3</sub> plus CD<sub>3</sub>OD).

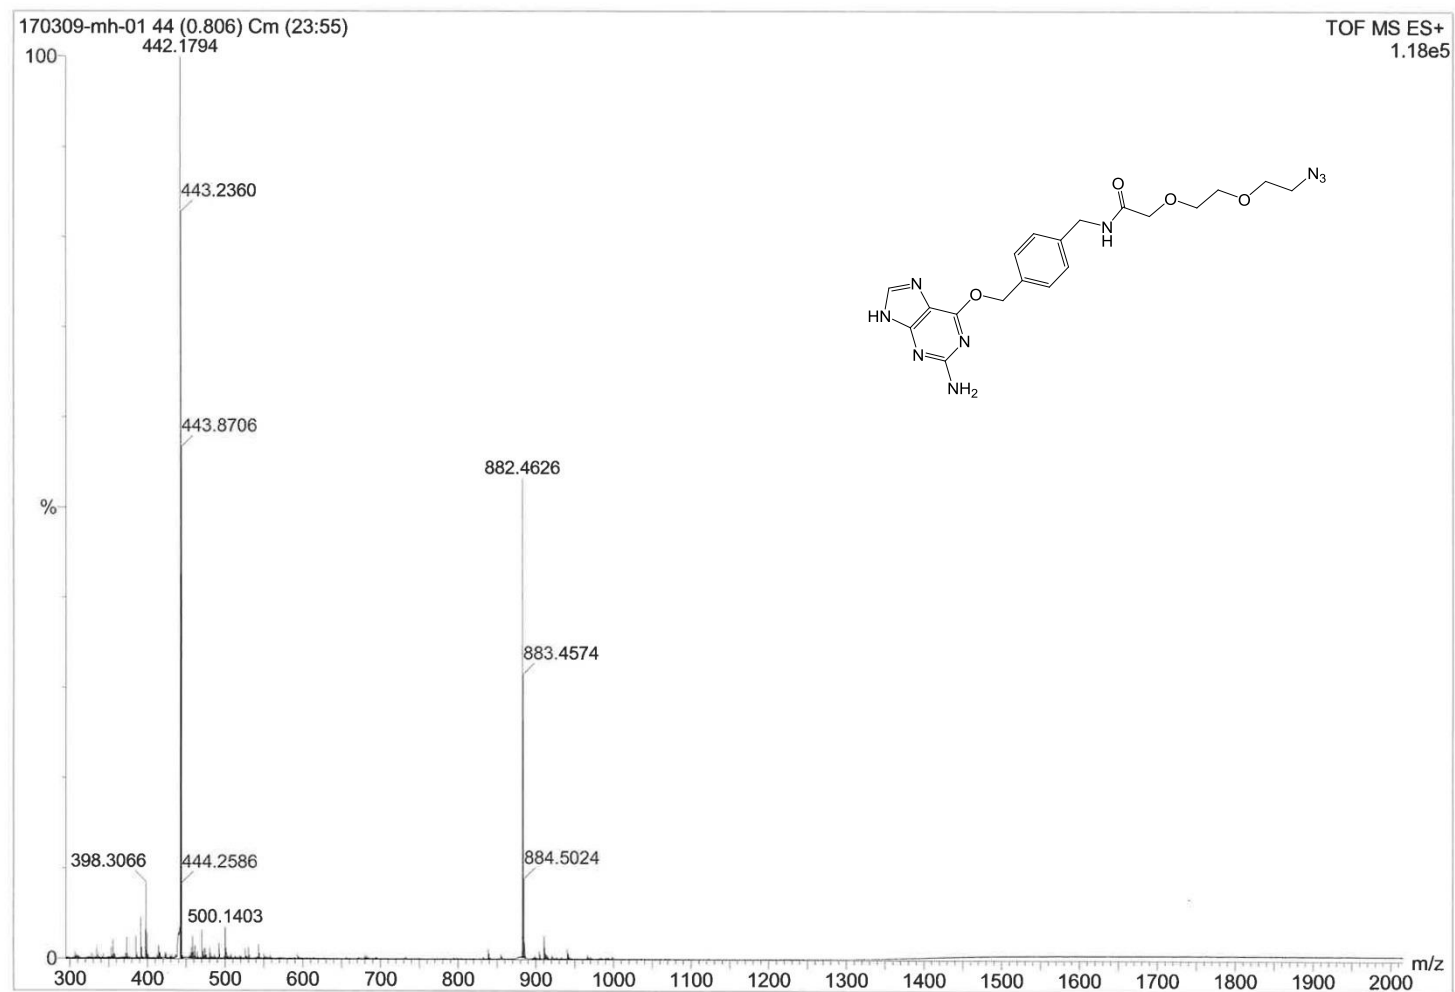

Figure S11. ESI-TOF mass spectrum of compound BG-N<sub>3</sub>.

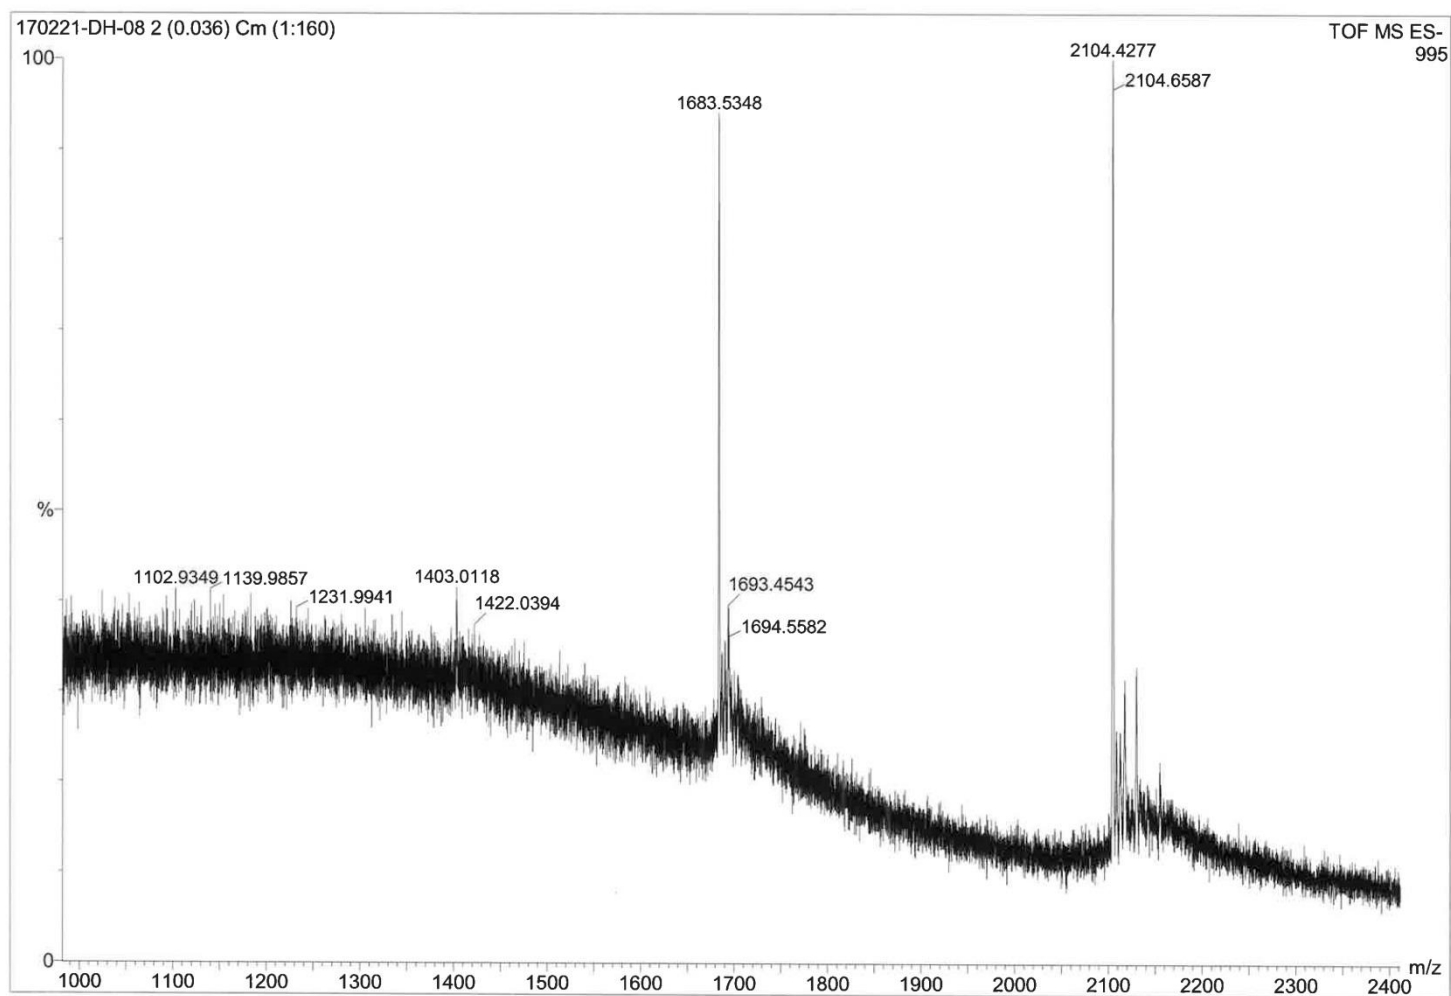

Figure S12. ESI-TOF mass spectrum of ON1.

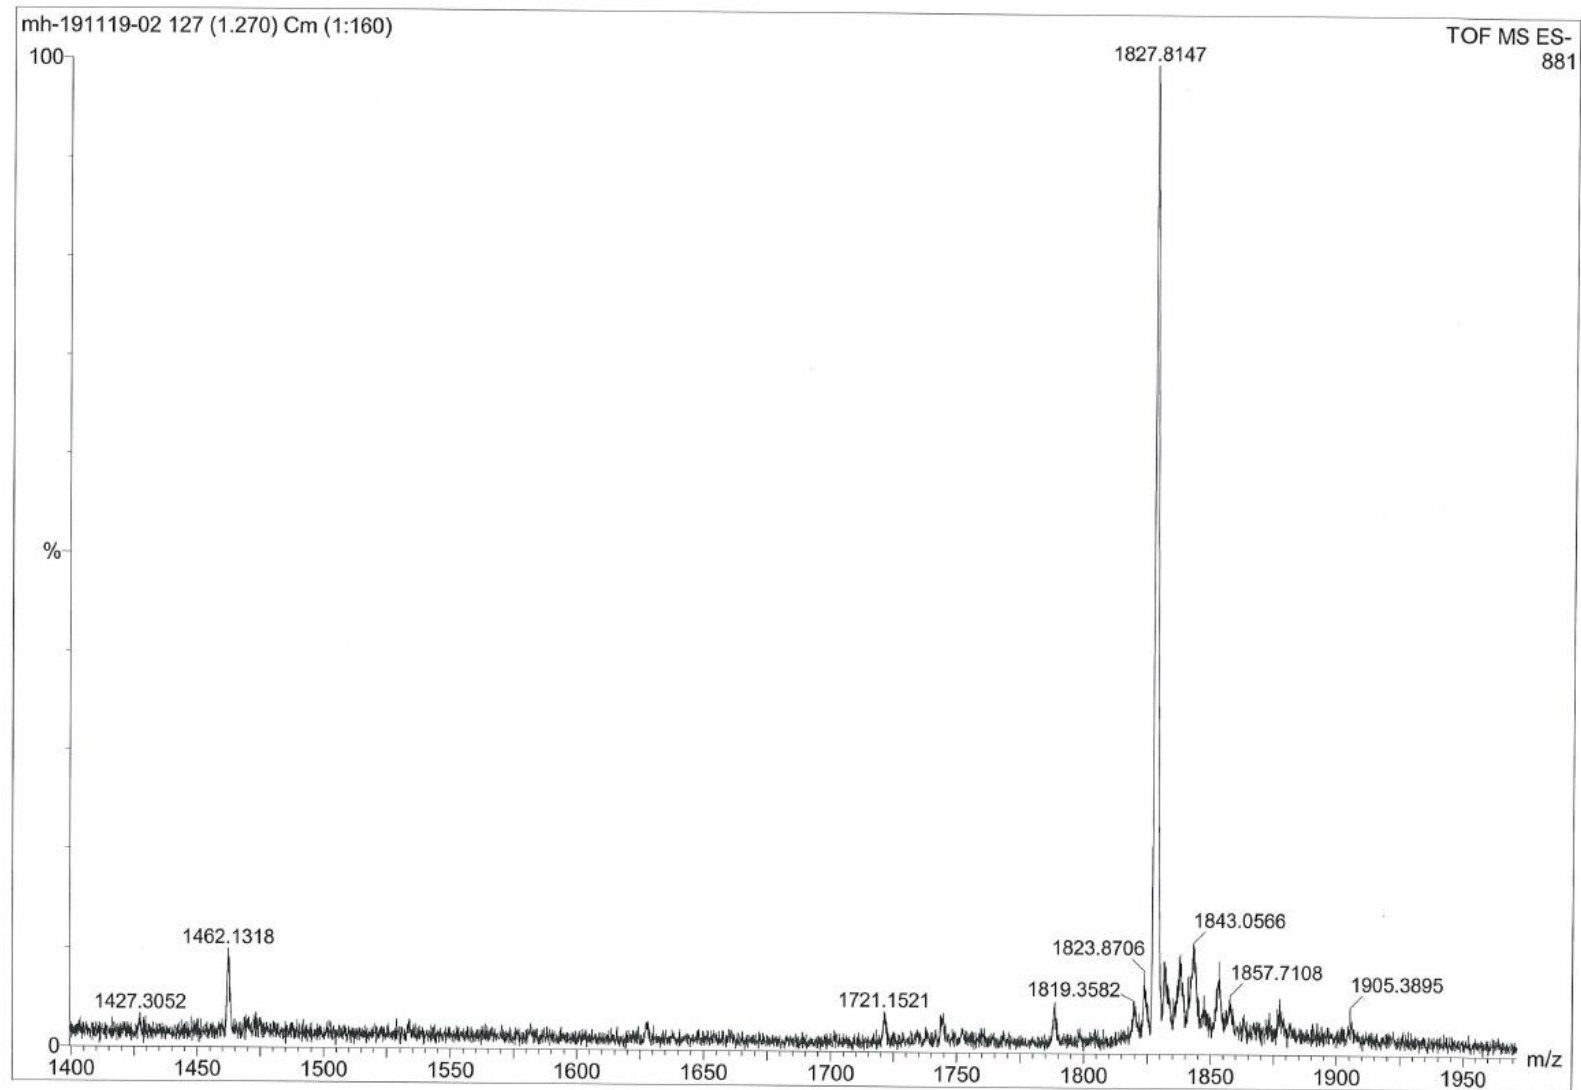

Figure S13. ESI-TOF mass spectrum of ON2.



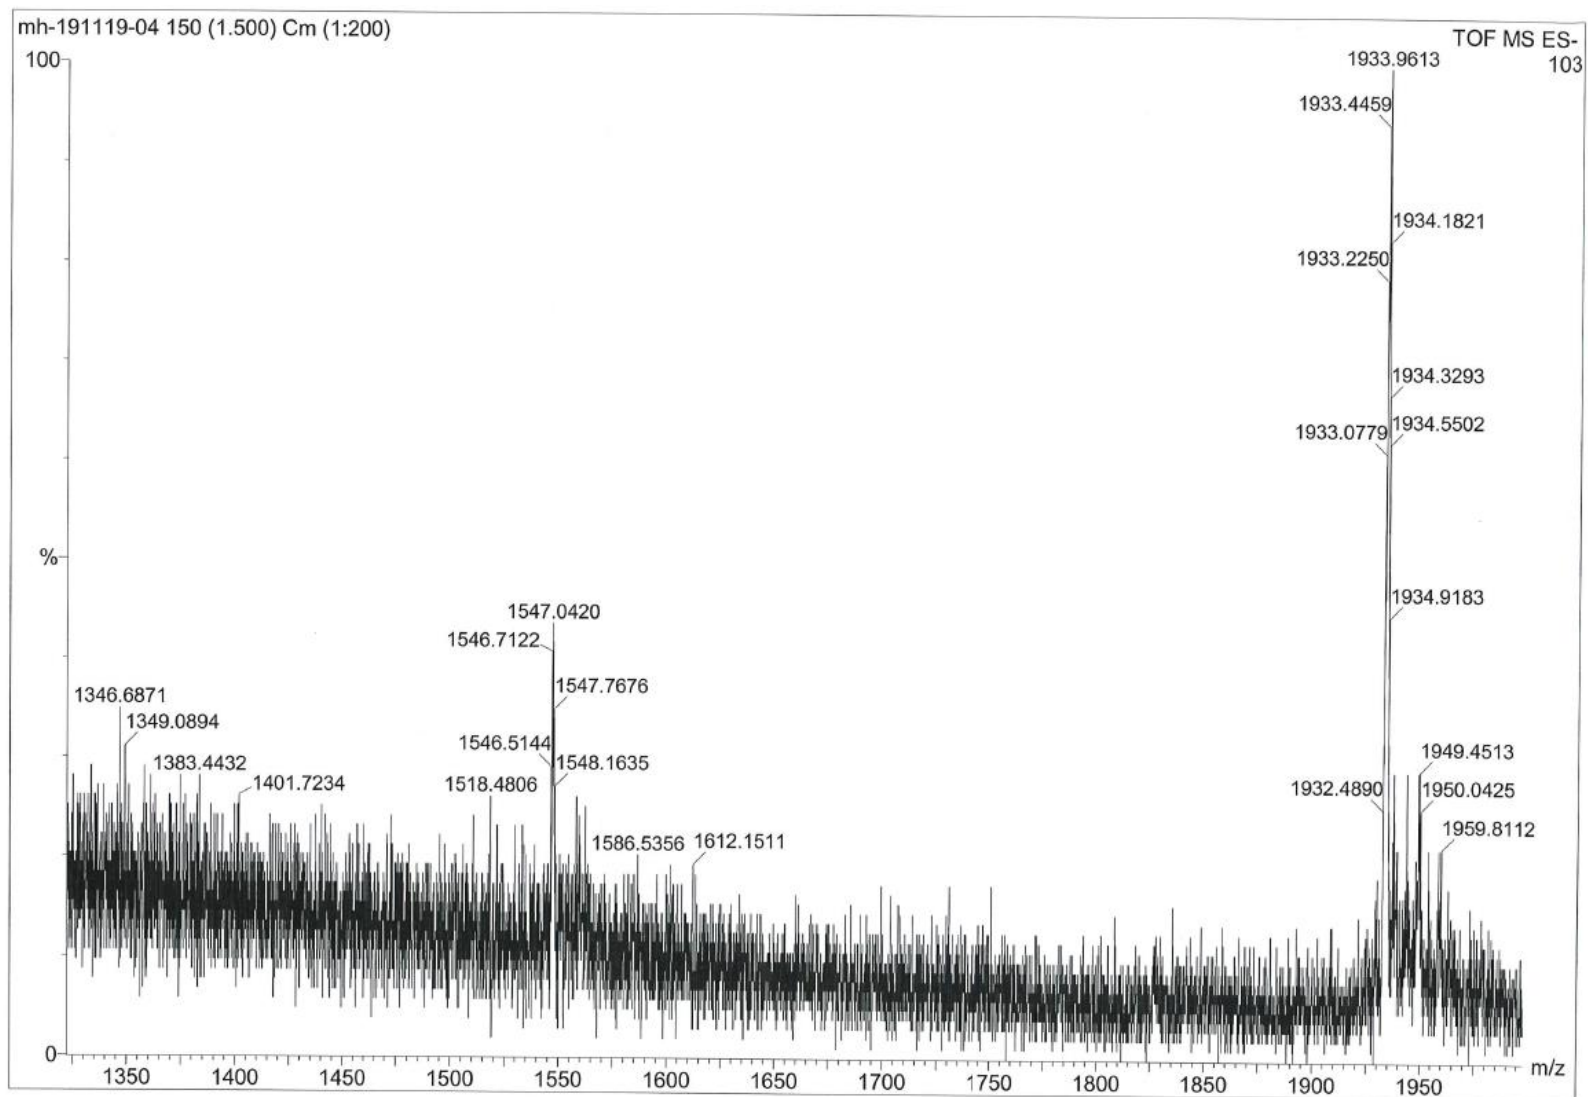

Figure S14. ESI-TOF mass spectrum of ON3.

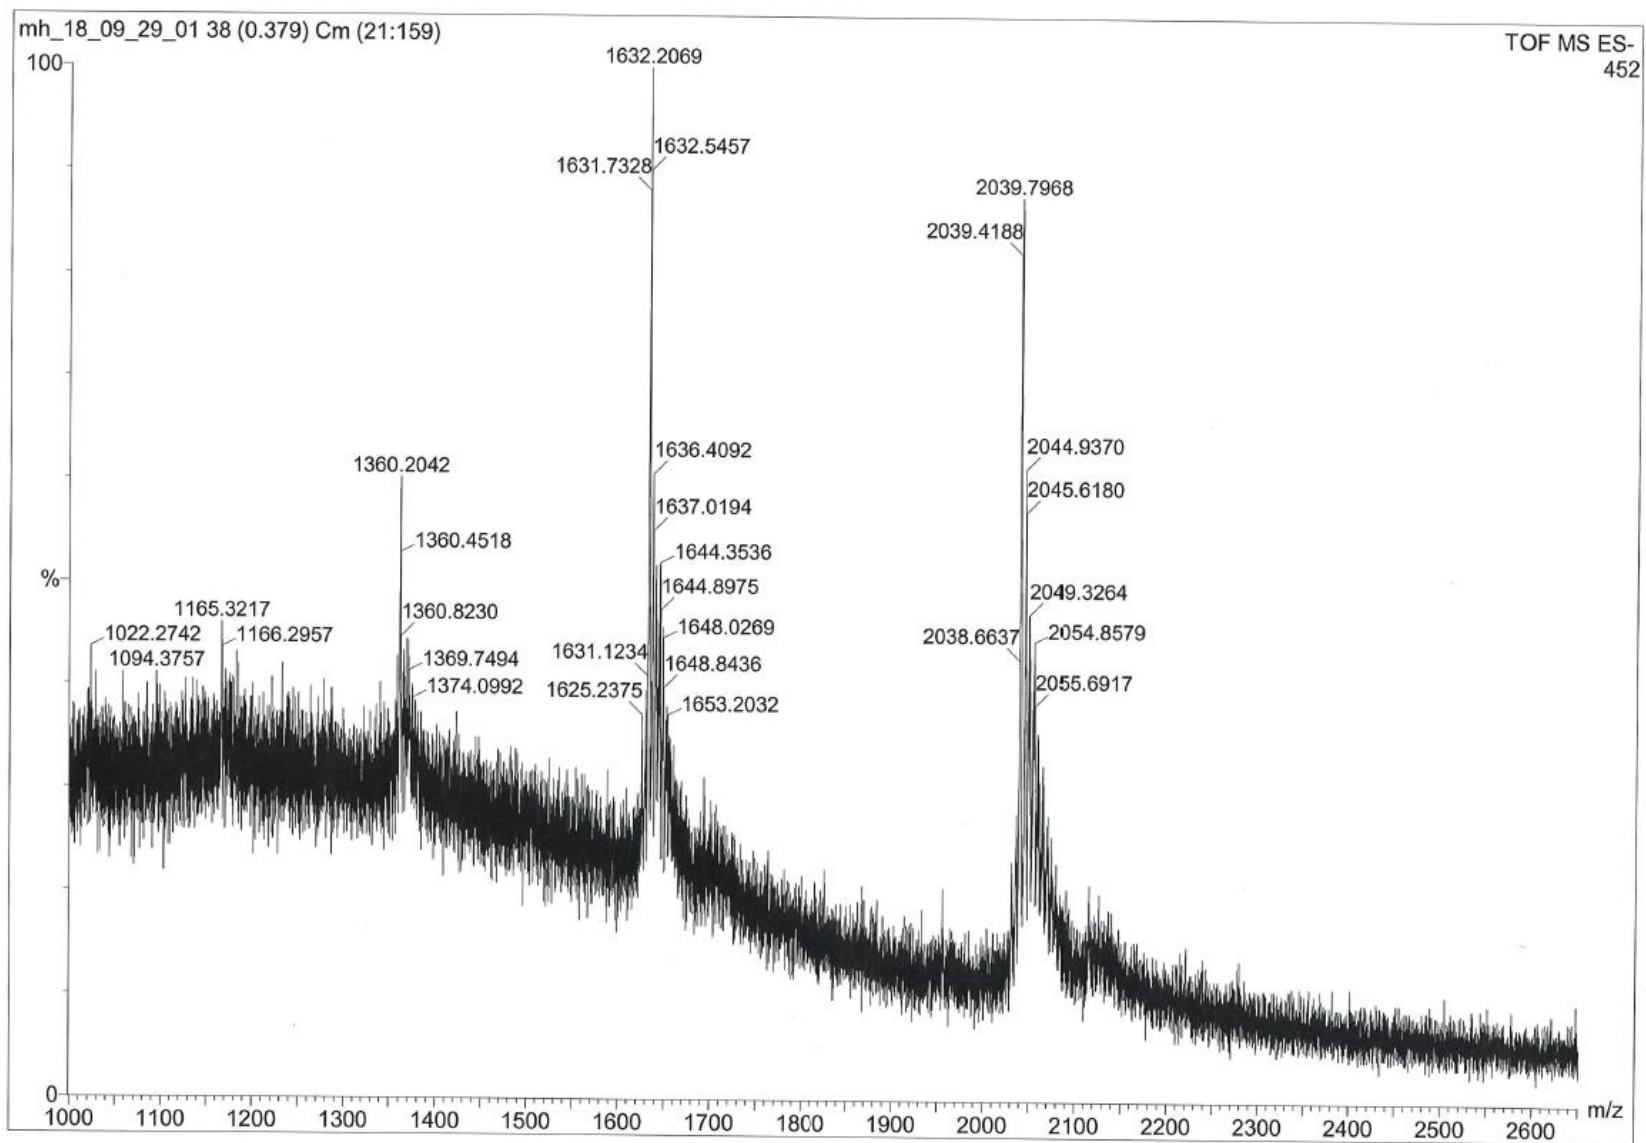

Figure S15. ESI-TOF mass spectrum of ON4.

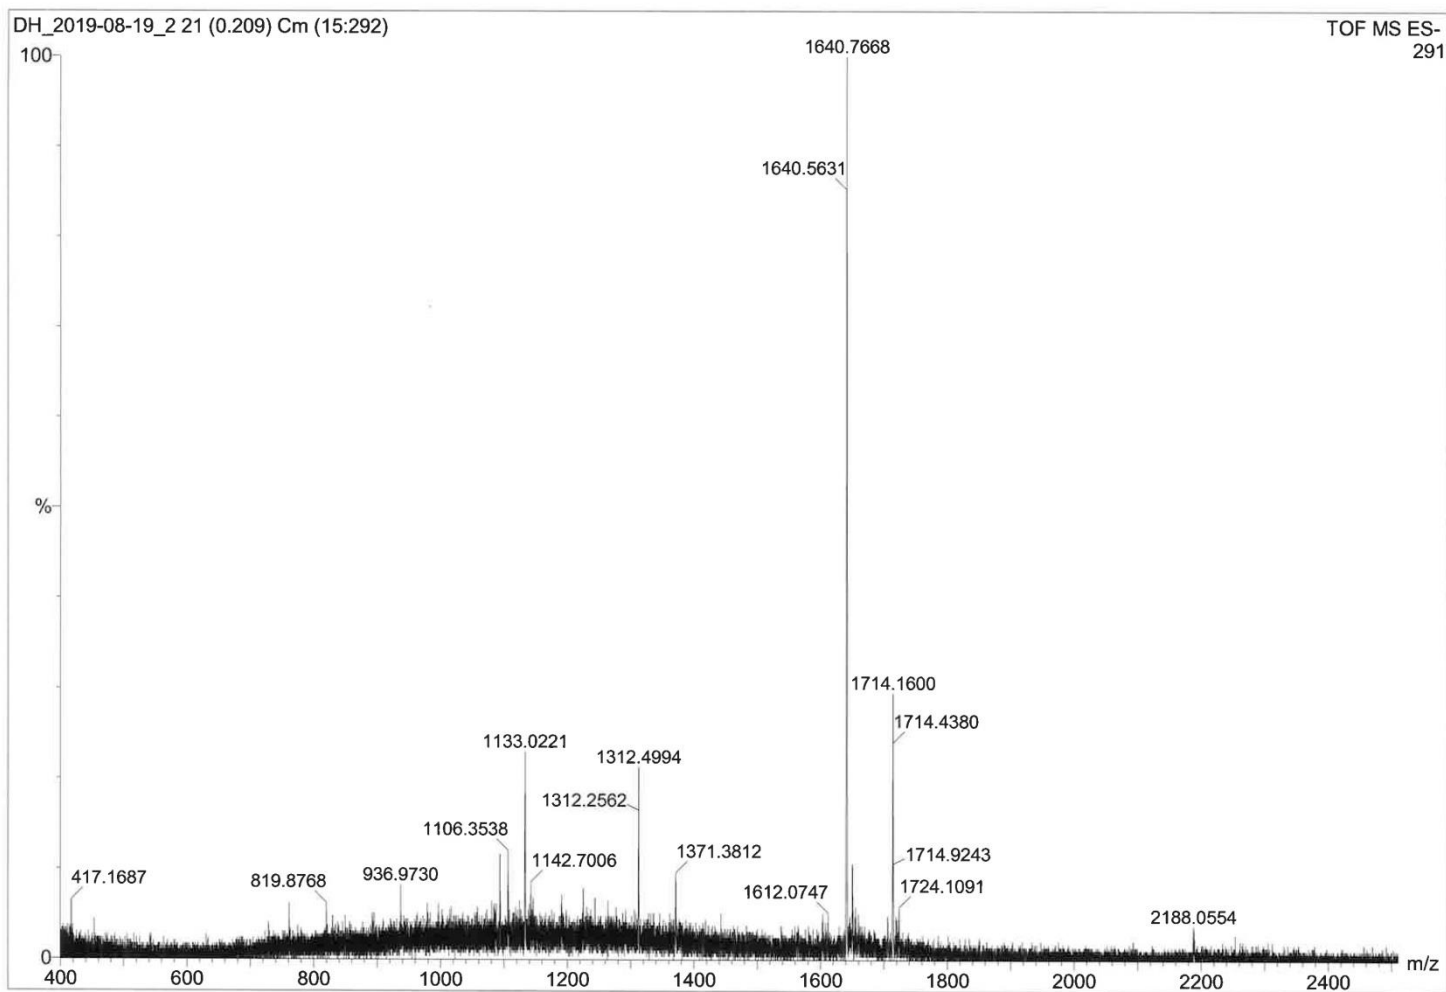

Figure S16. ESI-TOF mass spectrum of ON5.

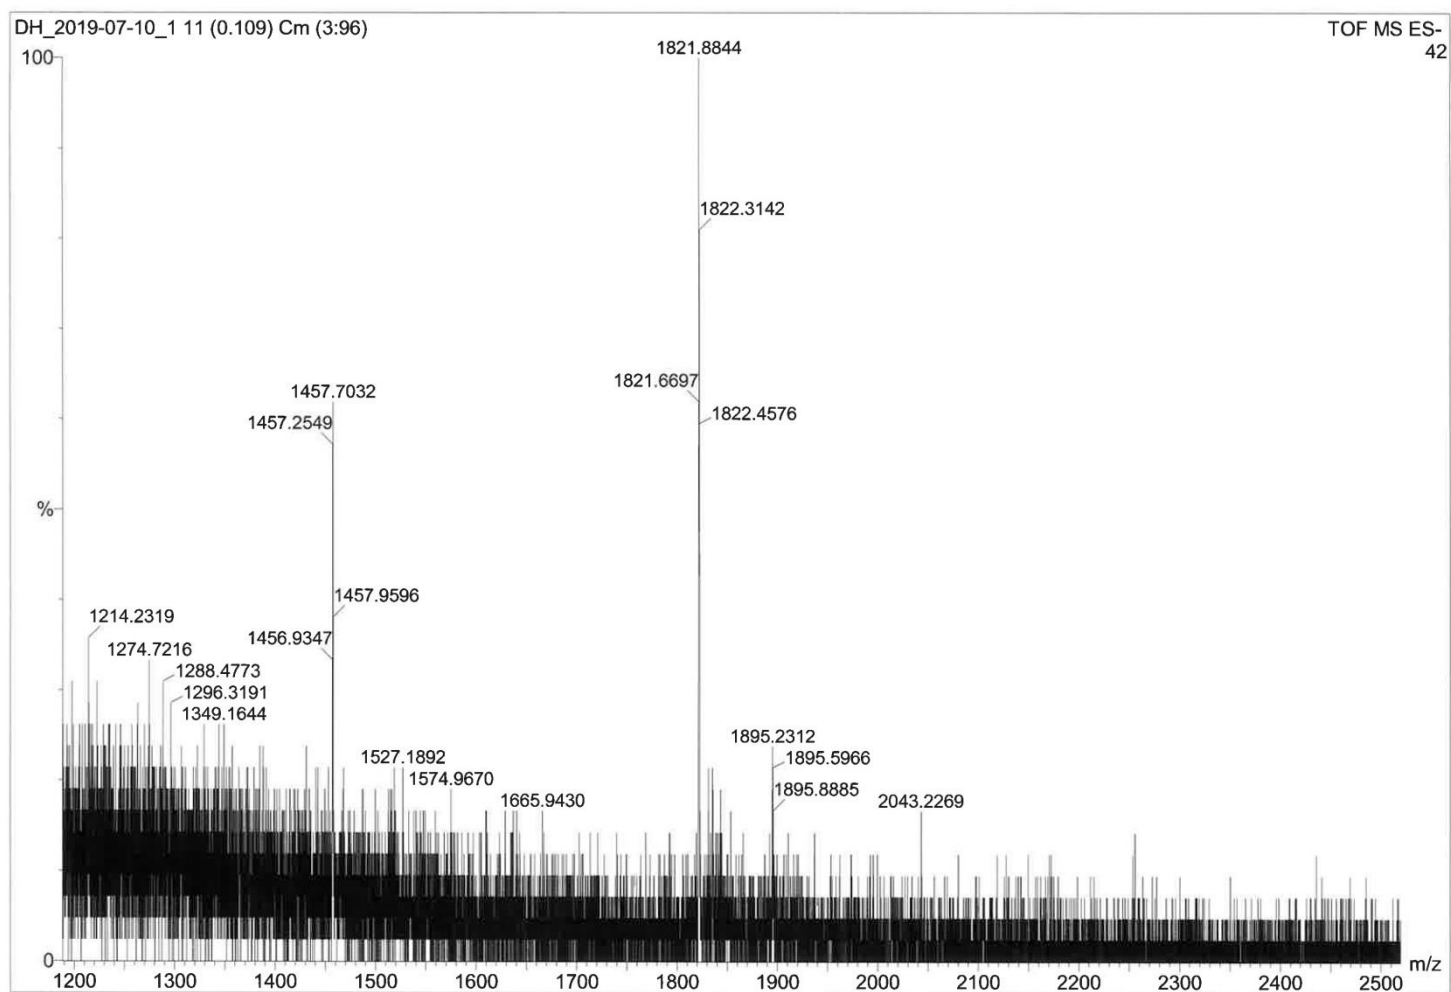

Figure S17. ESI-TOF mass spectrum of ON6.

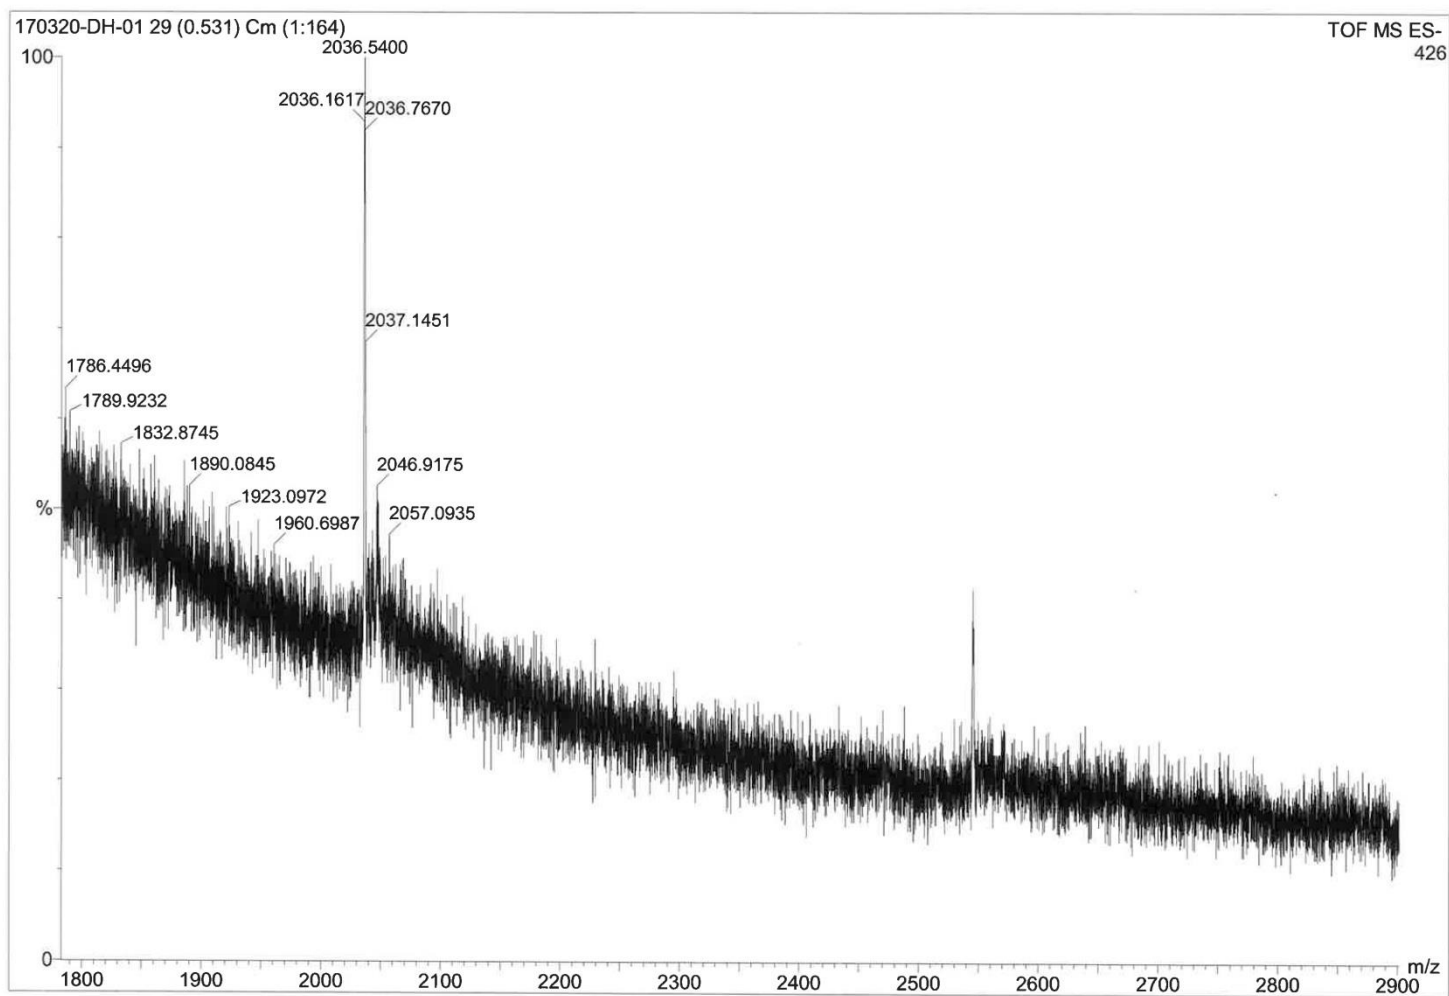

Figure S18. ESI-TOF mass spectrum of ON1-(BG)<sub>4</sub>.

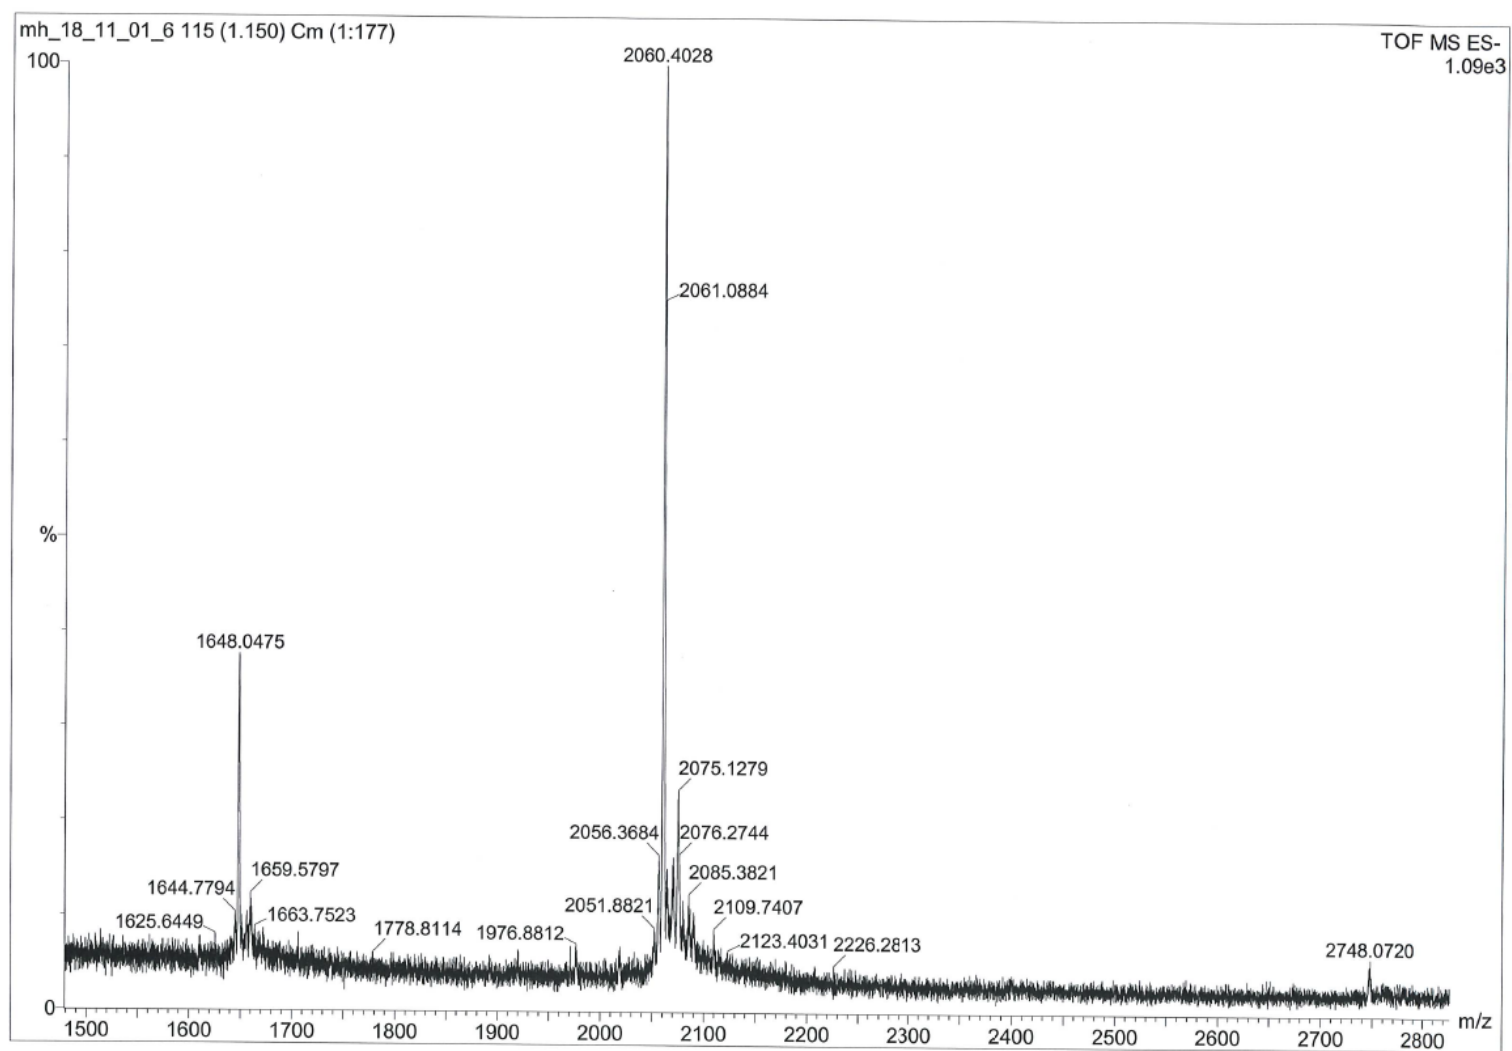

Figure S19. ESI-TOF mass spectrum of ON2-P4.

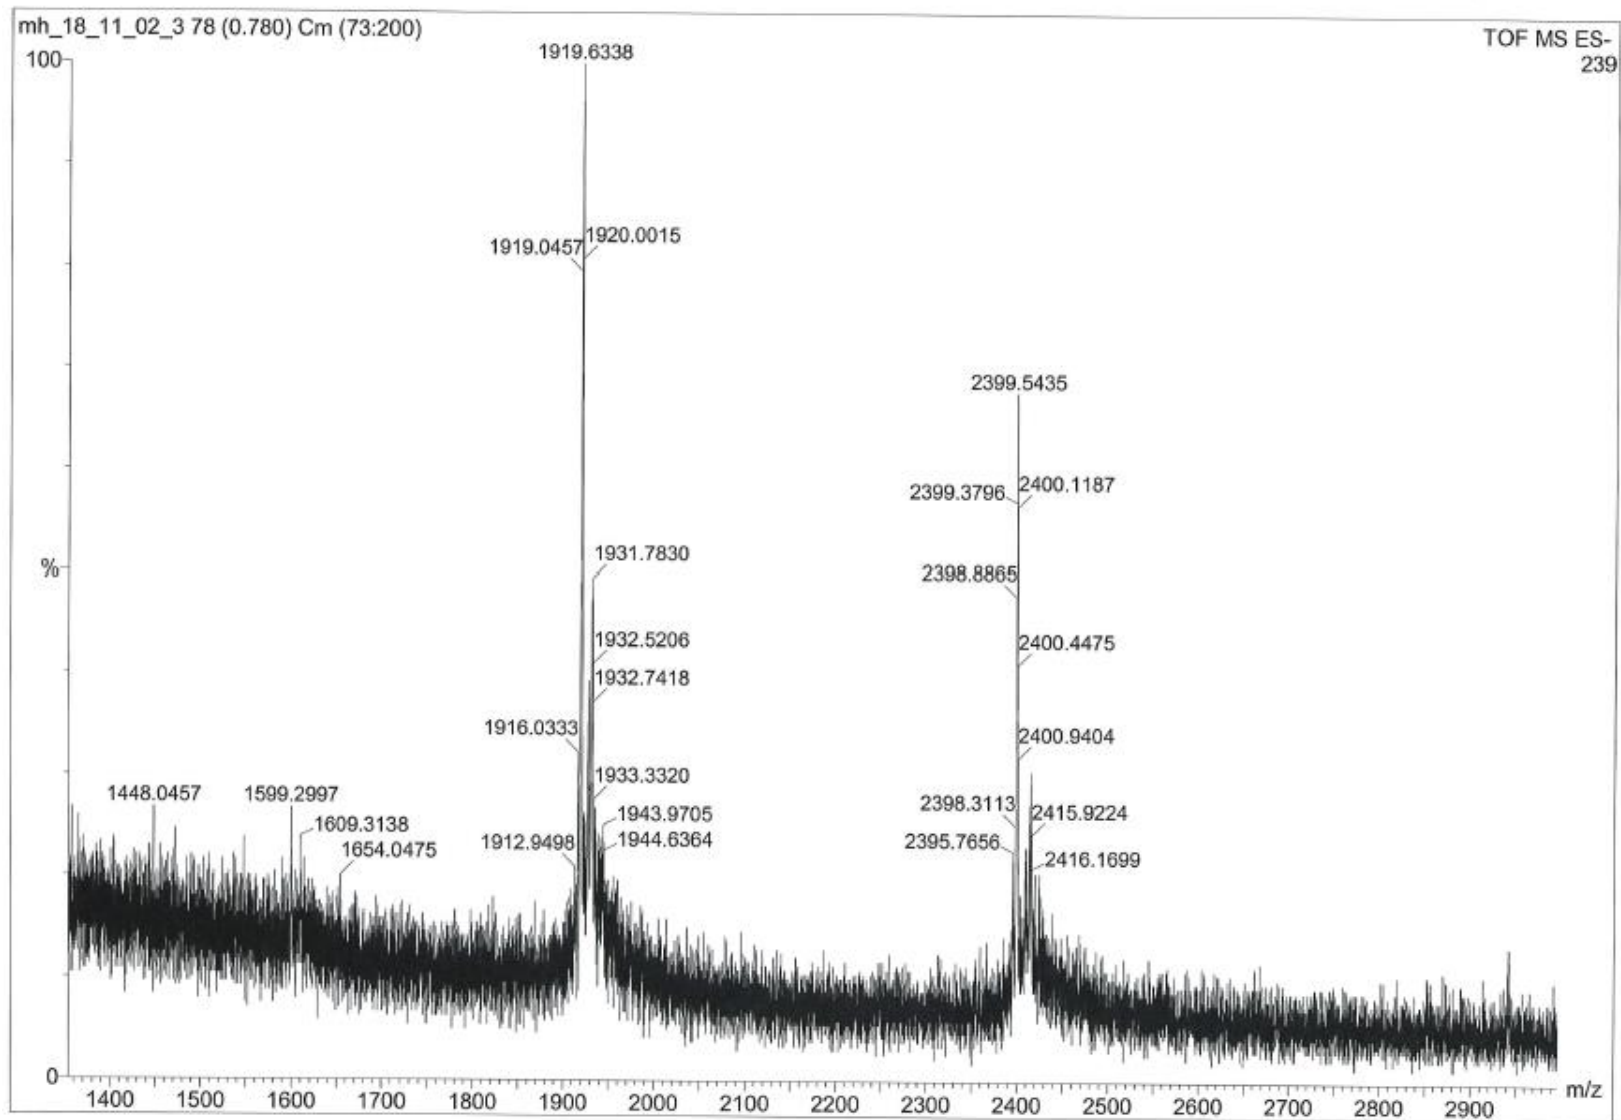

Figure S20. ESI-TOF mass spectrum of ON3-(P4)<sub>2</sub>.

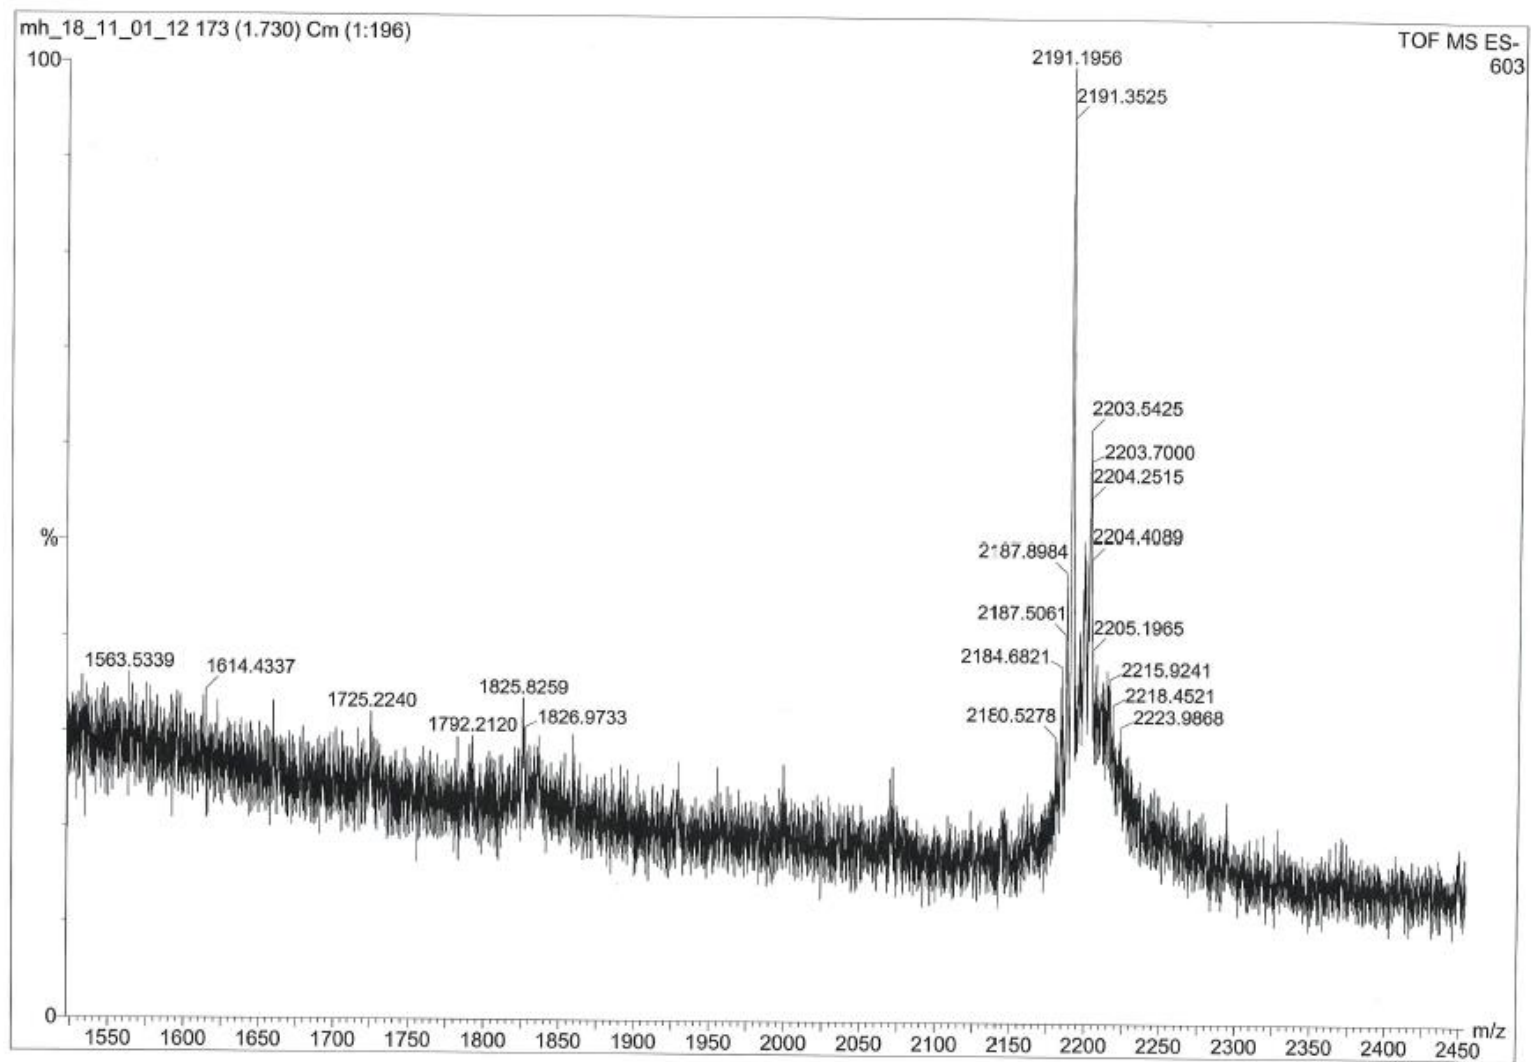

Figure S21. ESI-TOF mass spectrum of ON4-(P4)<sub>3</sub>.



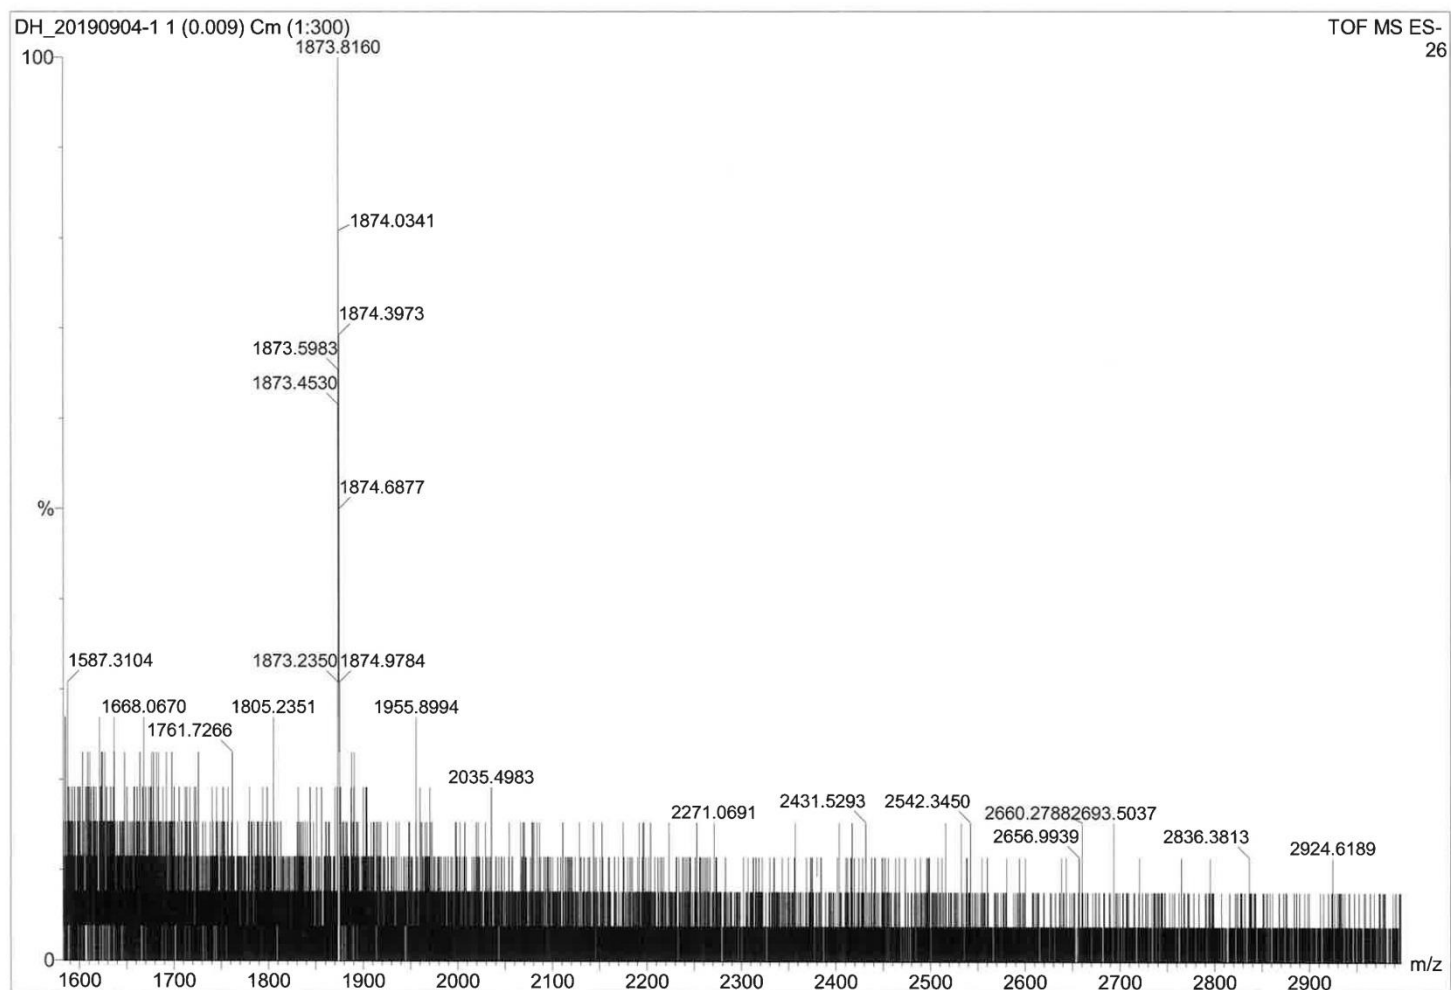

Figure S22. ESI-TOF mass spectrum of ON5-P4.

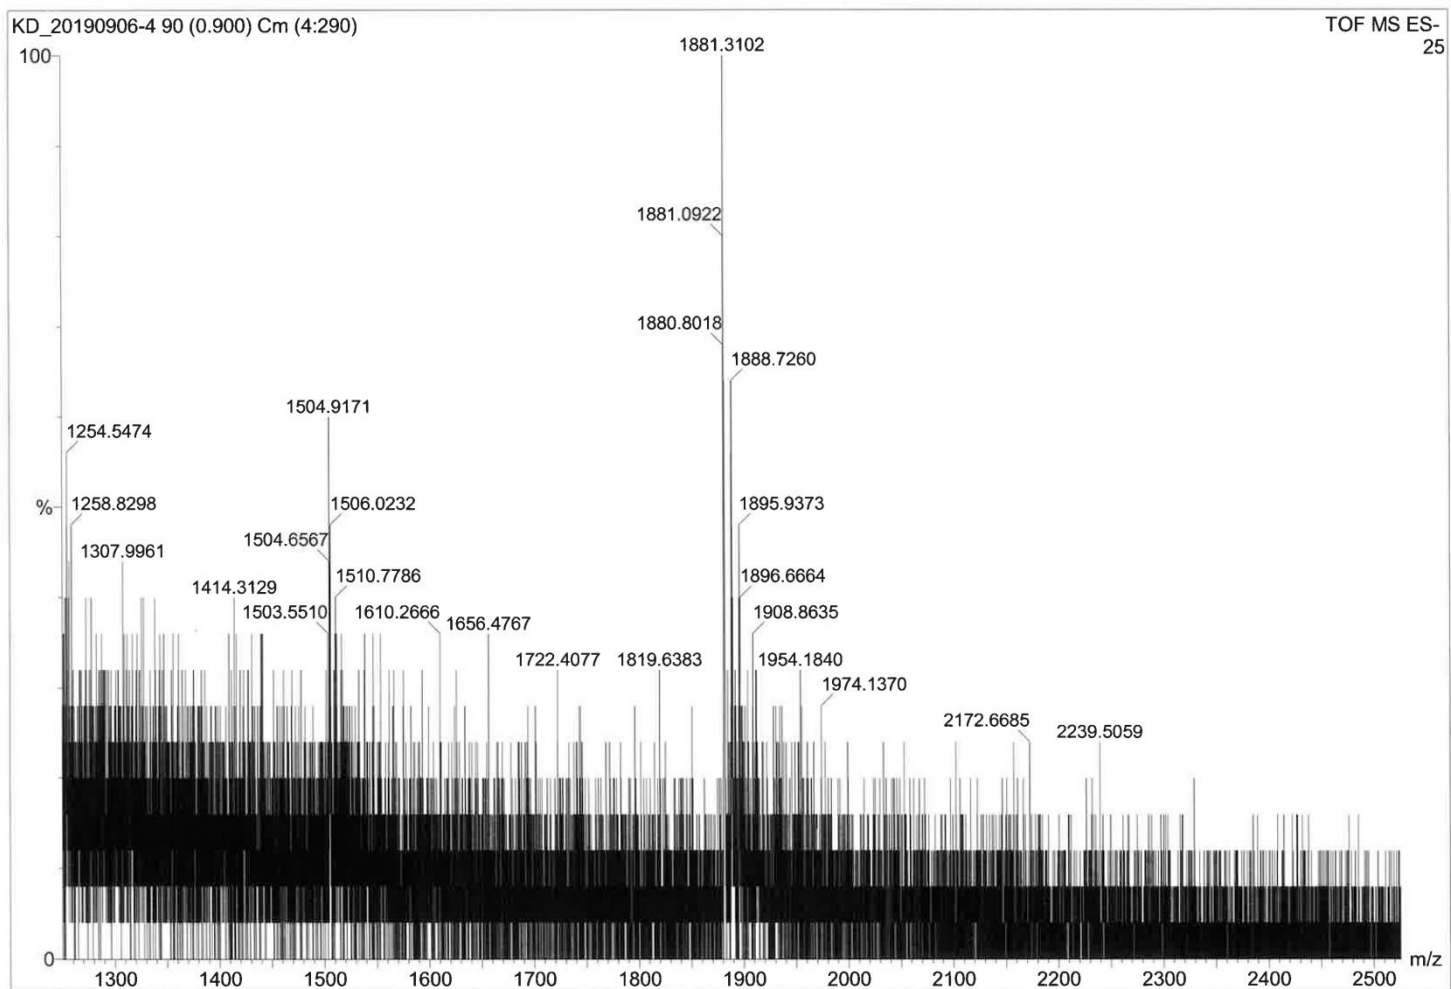

Figure S23. ESI-TOF mass spectrum of ON6-(PA).

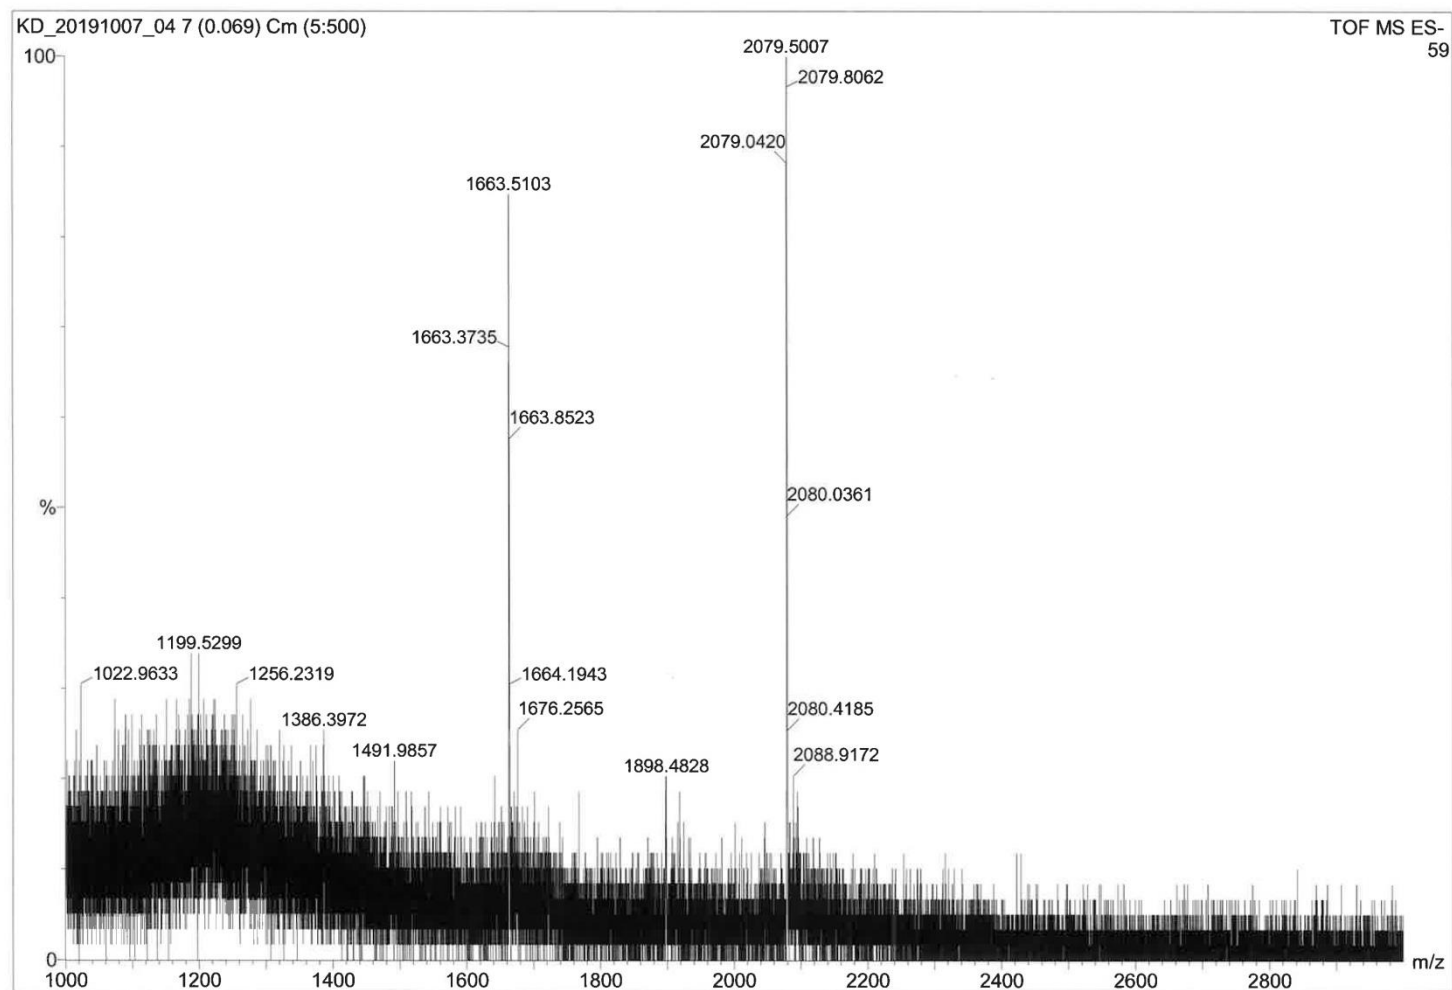

Figure S24. ESI-TOF mass spectrum of ON6-(MIF)-(PA)-(MIF).

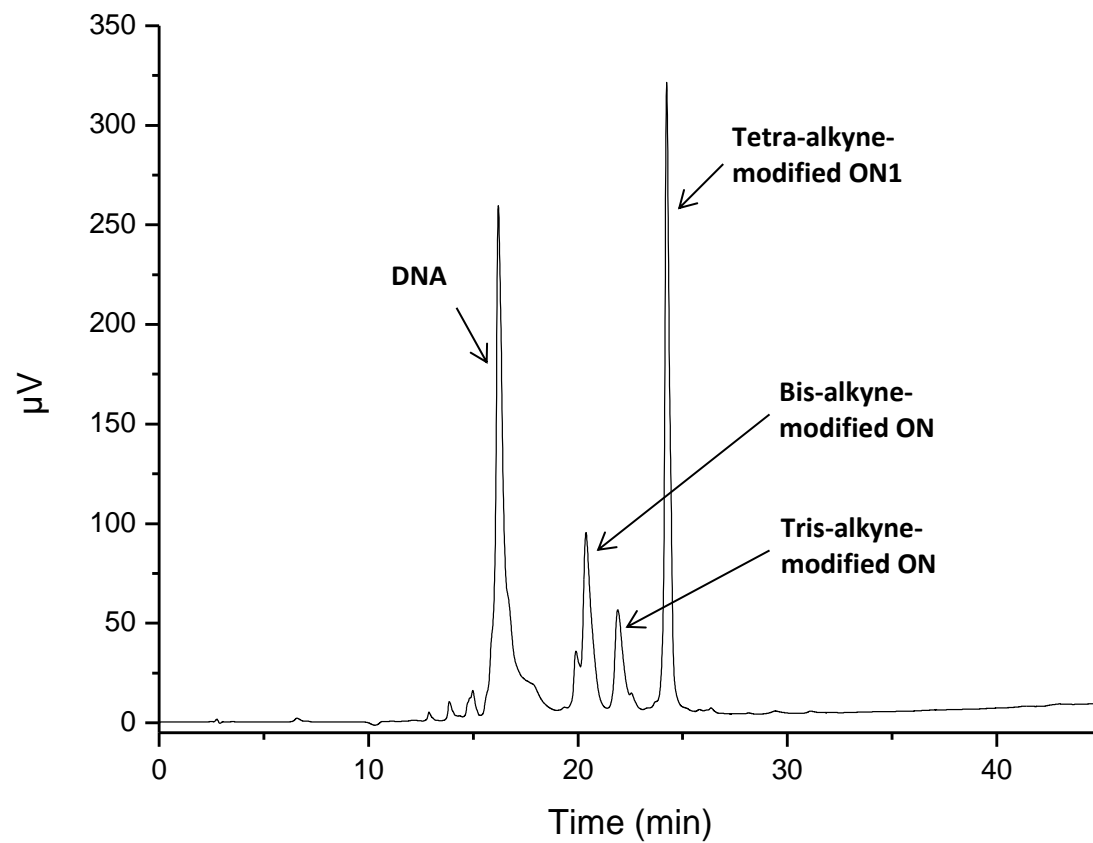

Figure S25. RP-HPLC profile of ON1 using RP HPLC on C18 column (Supelco Discovery BIO Wide Pore C18-5) with a linear gradient from 0 to 100% of buffer B in buffer A over 45 min at 25 °C. Buffer (A): 50 mM triethylammonium acetate (TEAA), pH 6.5; buffer (B): 50 mM TEAA, pH 6.5 in H<sub>2</sub>O-CH<sub>3</sub>CN (1:1 v/v).

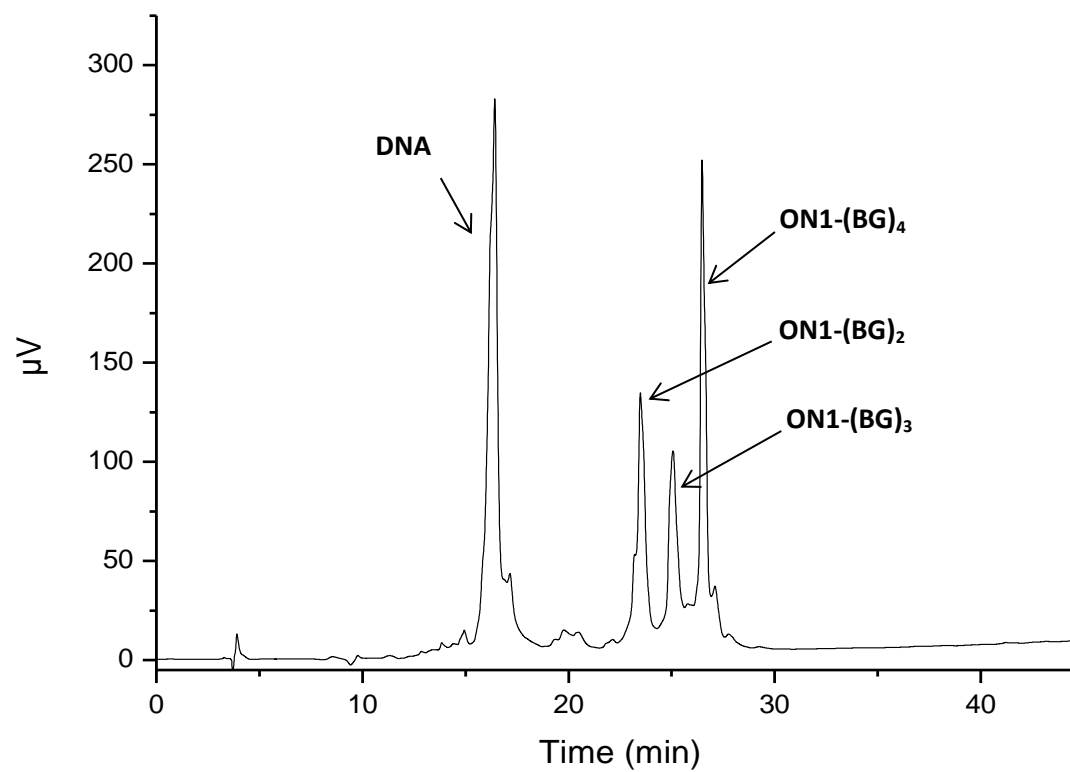

Figure S26. RP-HPLC profile of ON1-(BG)<sub>4</sub> using RP HPLC on C18 column (Supelco Discovery BIO Wide Pore C18-5) with a linear gradient from 0 to 100% of buffer B in buffer A over 45 min at 25 °C. Buffer (A): 50 mM triethylammonium acetate (TEAA), pH 6.5; buffer (B): 50 mM TEAA, pH 6.5 in H<sub>2</sub>O-CH<sub>3</sub>CN (1:1 v/v).

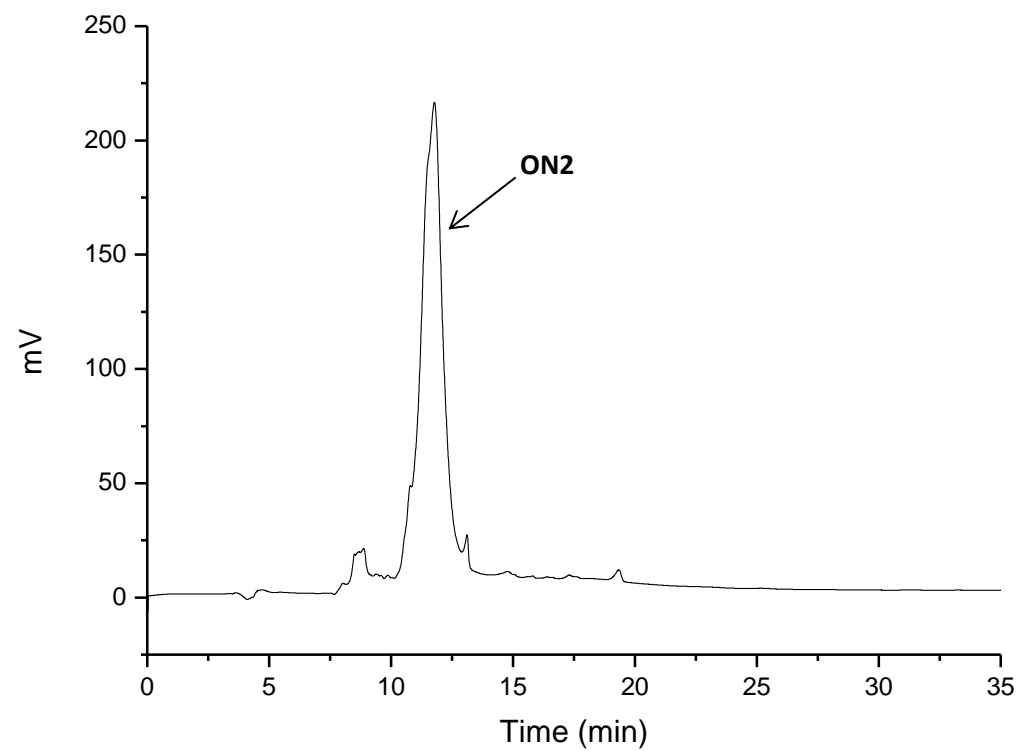

Figure S27. RP-HPLC profile of ON2 using RP HPLC on a C18 column (Supelco Discovery BIO Wide Pore C18-5) with a linear gradient from 0 to 100% of buffer B in buffer A over 30 min at 25 °C. Buffer (A): 50 mM triethylammonium acetate (TEAA), pH 6.5; buffer (B): 50 mM TEAA, pH 6.5 in H<sub>2</sub>O-CH<sub>3</sub>CN (1:1 v/v).

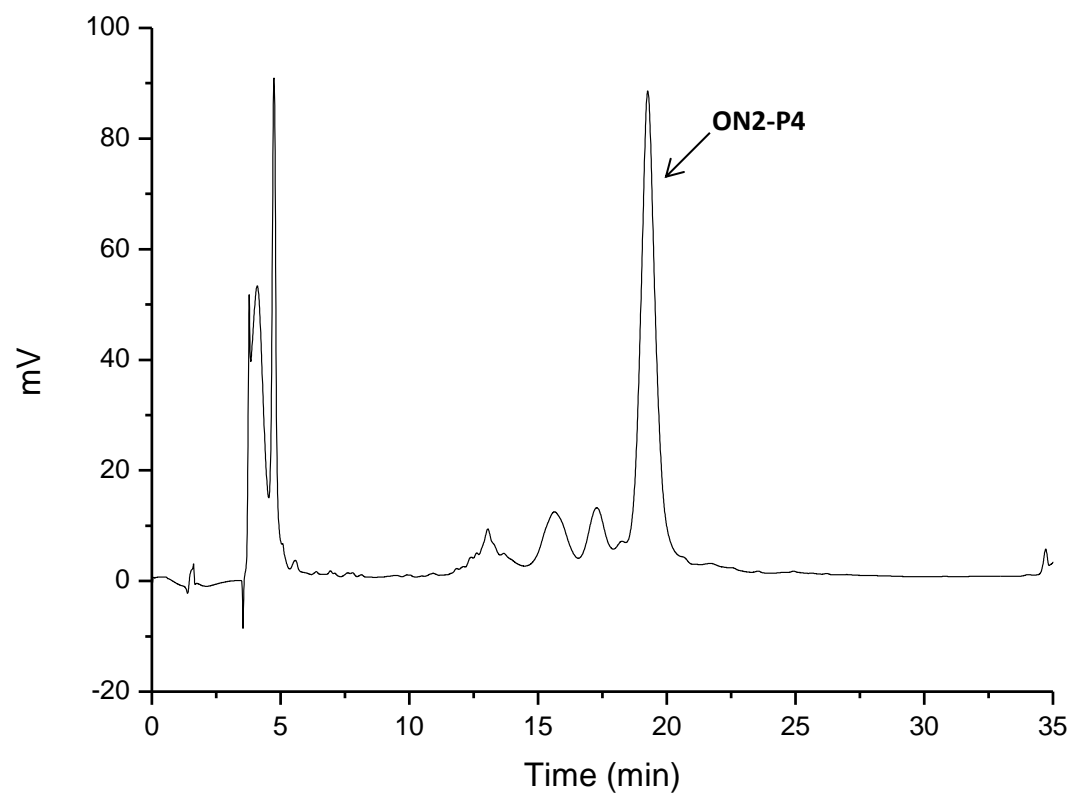

Figure S28. RP-HPLC profile of ON2-P4 using RP HPLC on a C18 column (Supelco Discovery BIO Wide Pore C18-5) with a linear gradient from 10 to 35% of buffer B in buffer A over 30 min at 25 °C. Buffer (A): 50 mM triethylammonium acetate (TEAA), pH 6.5; buffer (B): 50 mM TEAA, pH 6.5 in H<sub>2</sub>O-CH<sub>3</sub>CN (1:1 v/v).

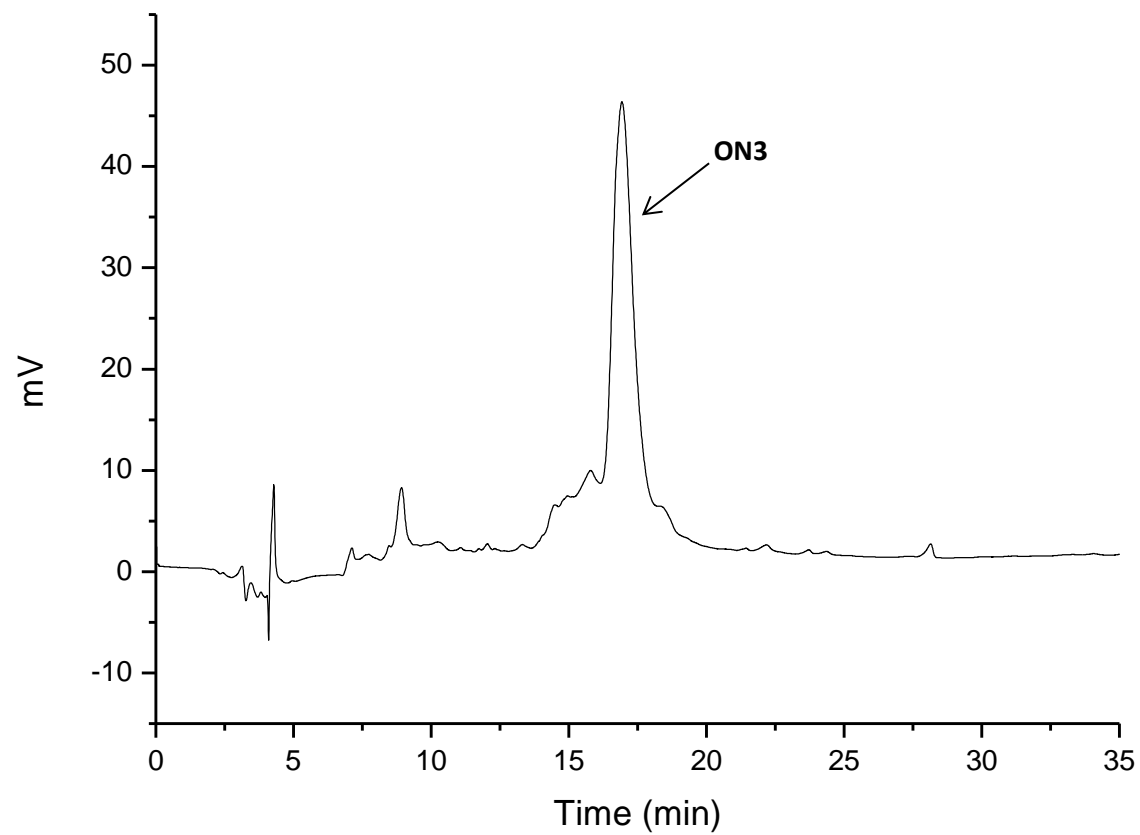

Figure S29. RP-HPLC profile of ON3 using RP HPLC on a C18 column (Supelco Discovery BIO Wide Pore C18-5) with a linear gradient from 0 to 100% of buffer B in buffer A over 30 min at 25 °C. Buffer (A): 50 mM triethylammonium acetate (TEAA), pH 6.5; buffer (B): 50 mM TEAA, pH 6.5 in H<sub>2</sub>O-CH<sub>3</sub>CN (1:1 v/v).



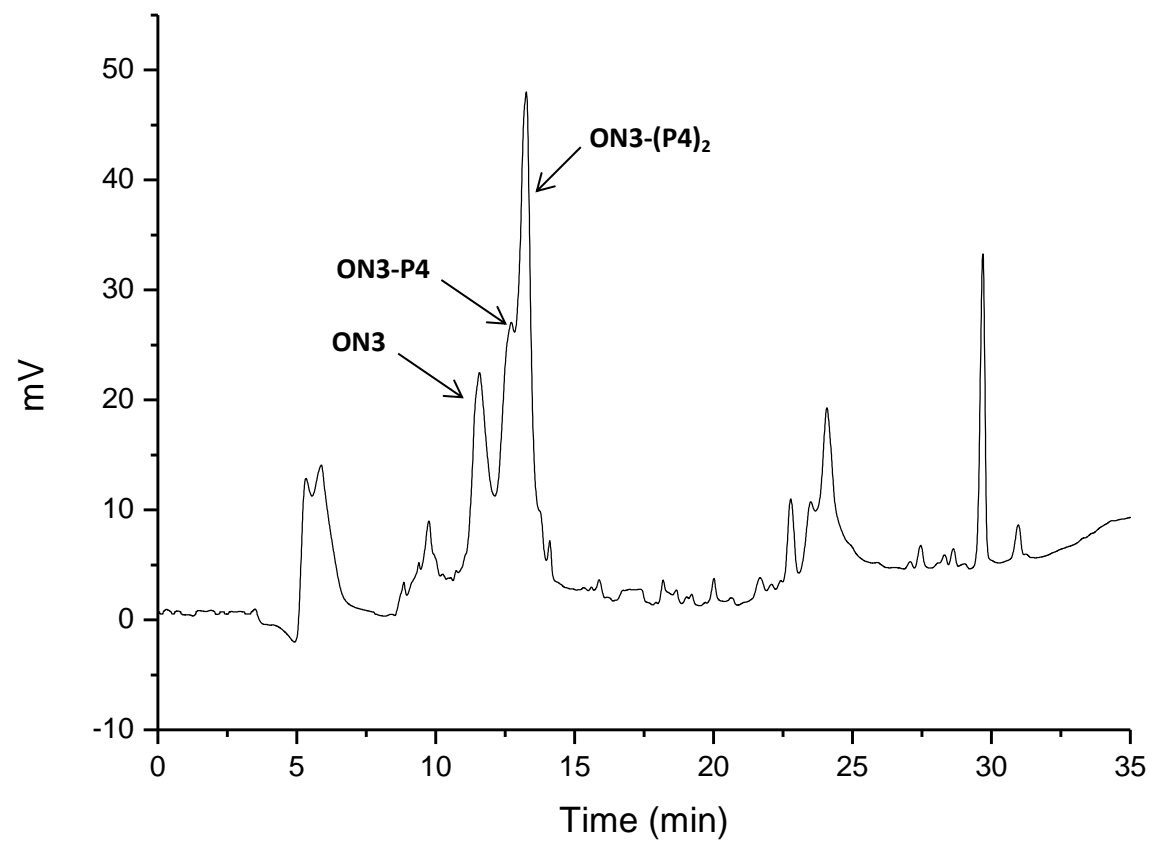

Figure S30. RP-HPLC profile of ON3-(P4)<sub>2</sub> using RP HPLC on C18 column (Supelco Discovery BIO Wide Pore C18-5) with a linear gradient from 0 to 100% of buffer B in buffer A over 30 min at 25 °C. Buffer (A): 50 mM triethylammonium acetate (TEAA), pH 6.5; buffer (B): 50 mM TEAA, pH 6.5 in H<sub>2</sub>O-CH<sub>3</sub>CN (1:1 v/v).

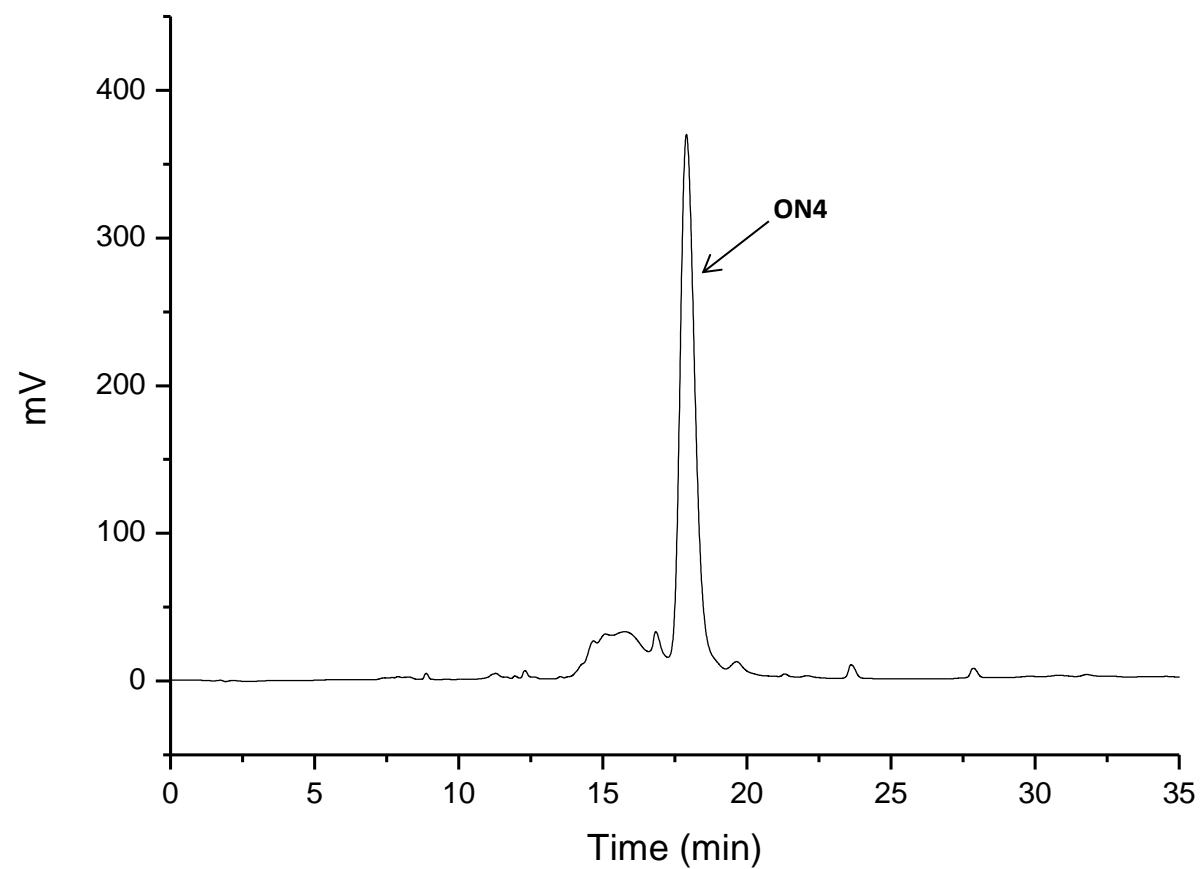

Figure S31. RP-HPLC profile of ON4 using RP HPLC on a C18 column (Supelco Discovery BIO Wide Pore C18-5) with a linear gradient from 0 to 100% of buffer B in buffer A over 30 min at 25 °C. Buffer (A): 50 mM triethylammonium acetate (TEAA), pH 6.5; buffer (B): 50 mM TEAA, pH 6.5 in H<sub>2</sub>O-CH<sub>3</sub>CN (1:1 v/v).

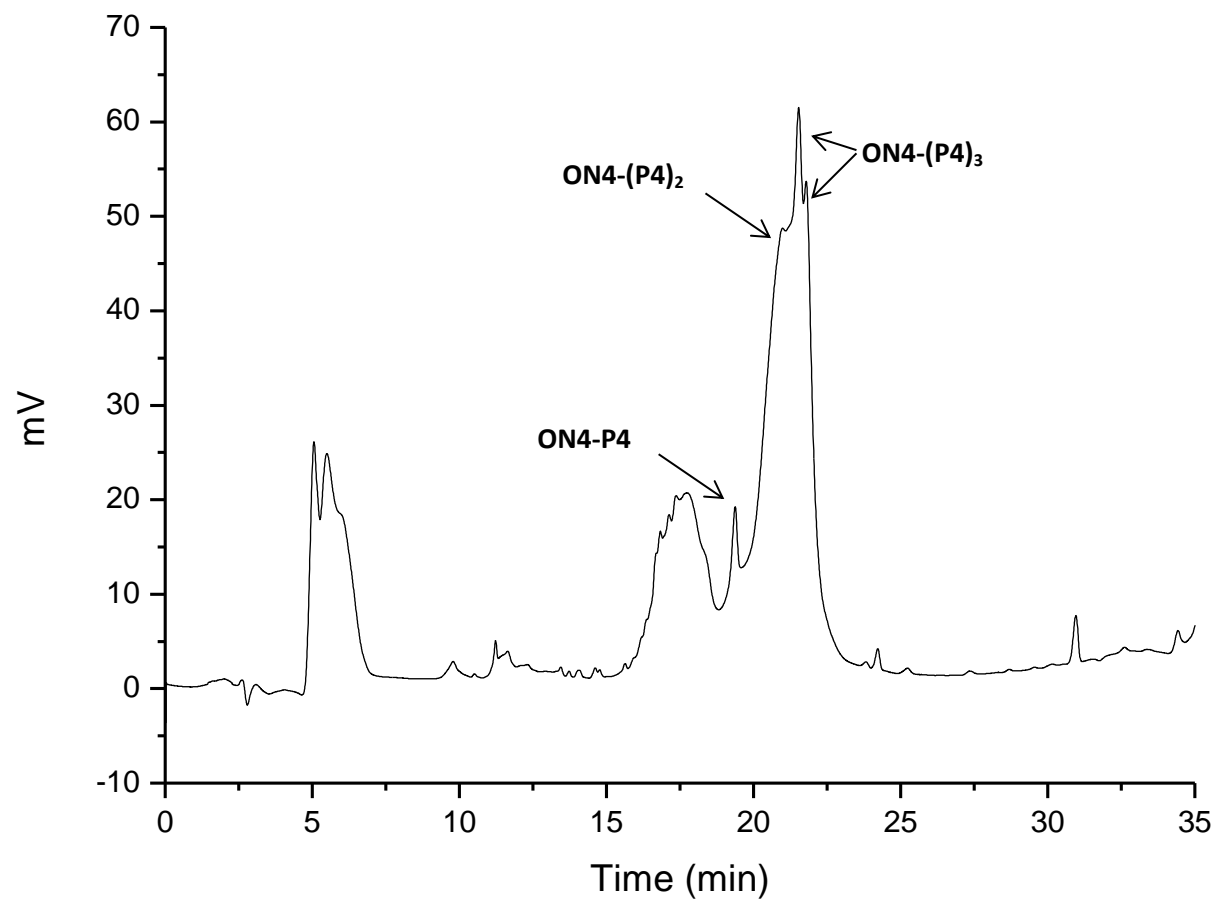

Figure S32. RP-HPLC profile of ON4-(P4)<sub>3</sub> using RP HPLC on C18 column (Supelco Discovery BIO Wide Pore C18-5) with a linear gradient from 0 to 50% of buffer B in buffer A over 30 min at 25 °C. Buffer (A): 50 mM triethylammonium acetate (TEAA), pH 6.5; buffer (B): 50 mM TEAA, pH 6.5 in H<sub>2</sub>O-CH<sub>3</sub>CN (1:1 v/v).

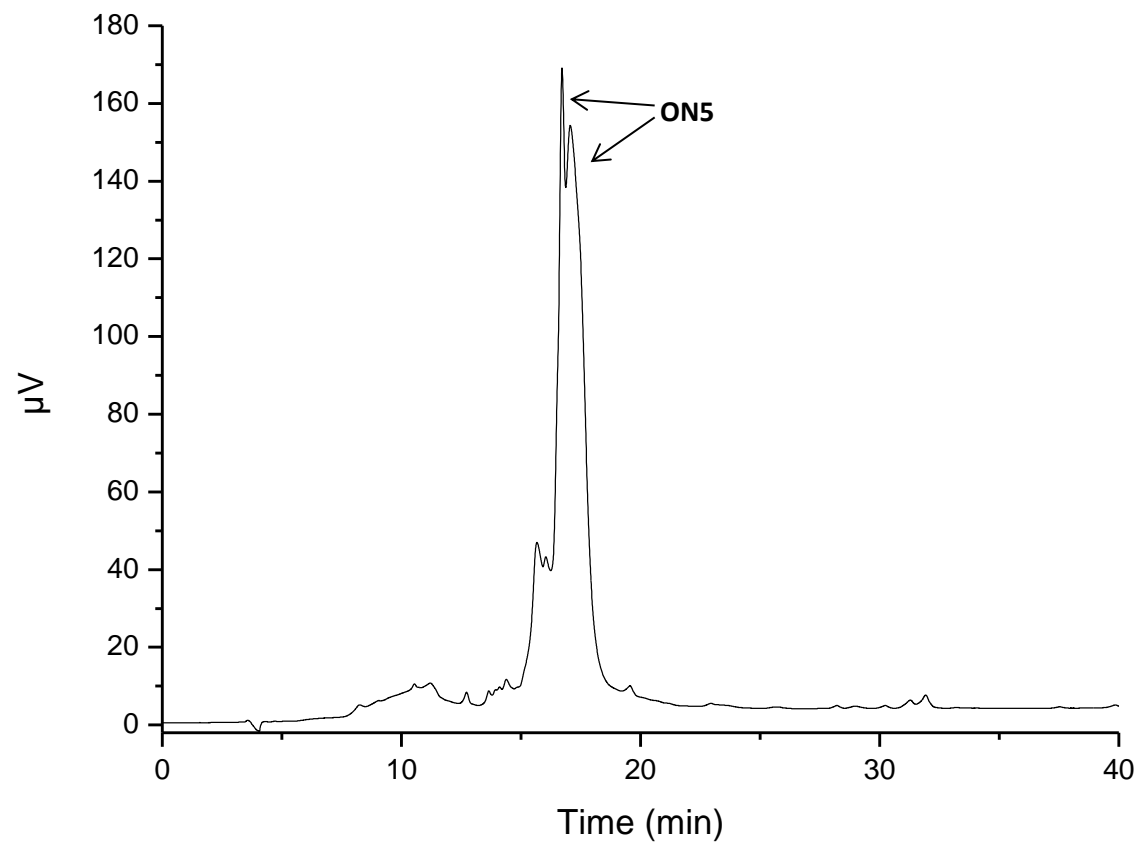

Figure S33. RP-HPLC profile of ON5 using RP HPLC on a C18 column (Supelco Discovery BIO Wide Pore C18-5) with a linear gradient from 0 to 50% of buffer B in buffer A over 45 min at 25 °C. Buffer (A): 50 mM triethylammonium acetate (TEAA), pH 6.5; buffer (B): 50 mM TEAA, pH 6.5 in H<sub>2</sub>O-CH<sub>3</sub>CN (1:1 v/v).

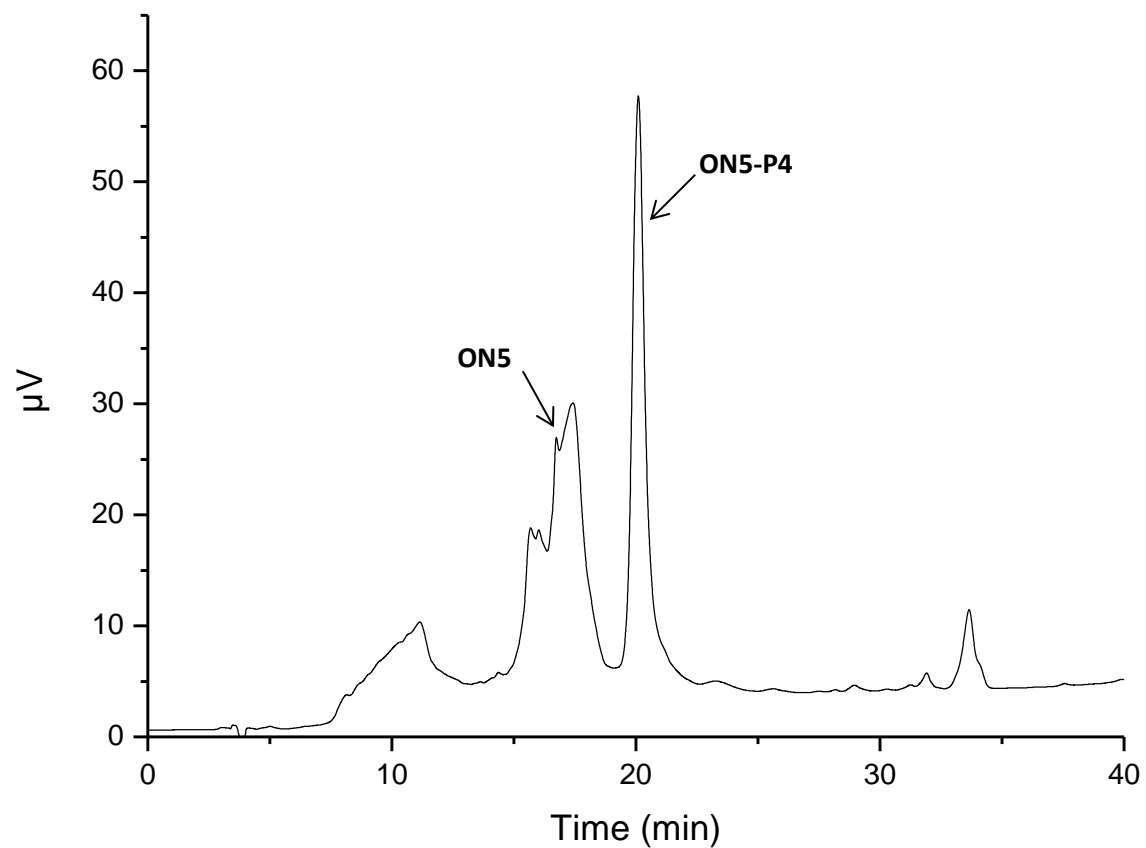

Figure S34. RP-HPLC profile of ON5-P4 using RP HPLC on a C18 column (Supelco Discovery BIO Wide Pore C18-5) with a linear gradient from 0 to 50% of buffer B in buffer A over 45 min at 25 °C. Buffer (A): 50 mM triethylammonium acetate (TEAA), pH 6.5; buffer (B): 50 mM TEAA, pH 6.5 in H<sub>2</sub>O-CH<sub>3</sub>CN (1:1 v/v).

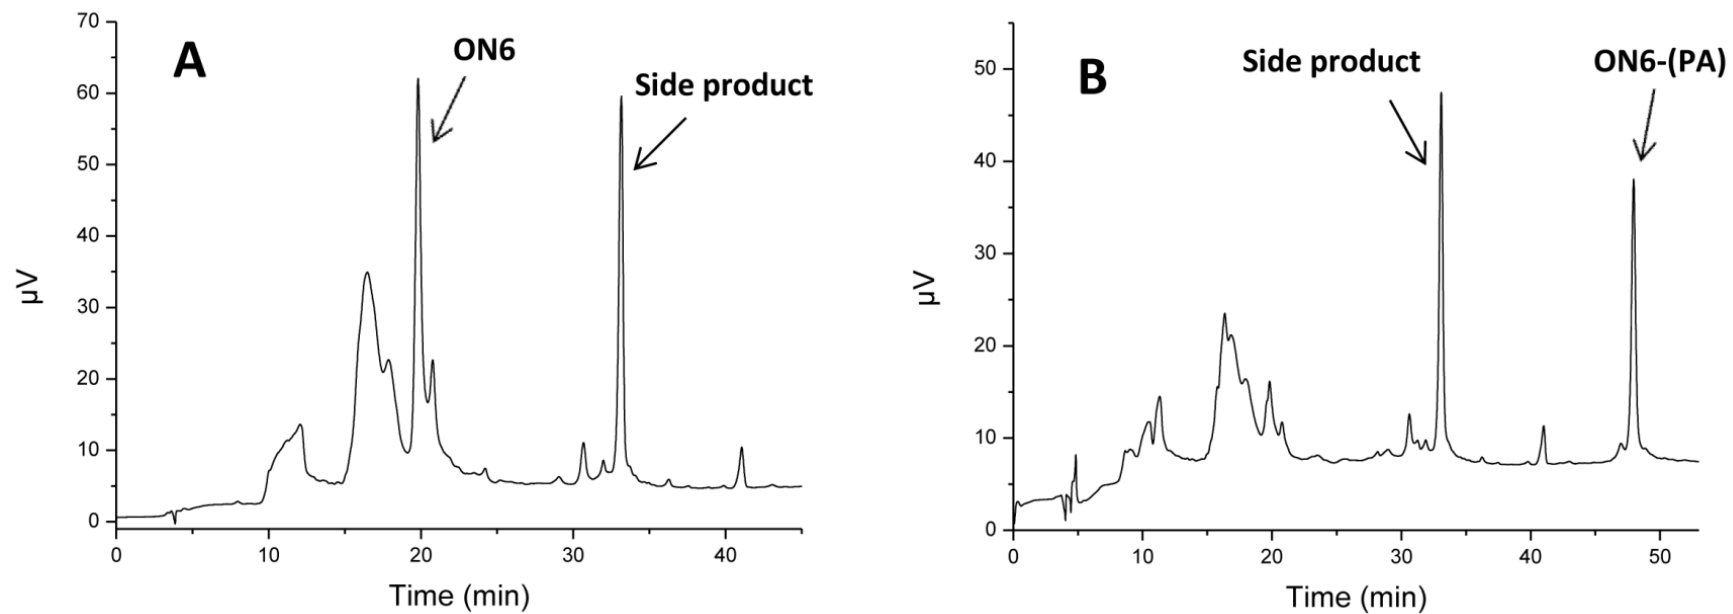

Figure S35. RP-HPLC profiles of (A) ON6 and (B) ON6-(PA) showing formation of side product after deprotection of Fmoc group using 20% piperidine solution in DMF.

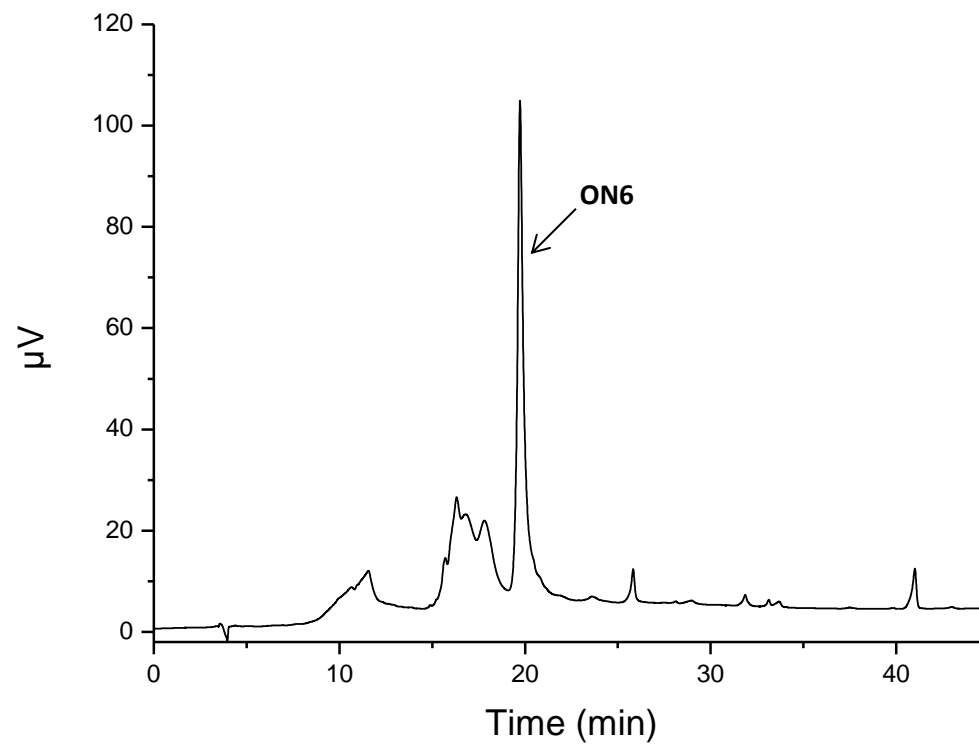

Figure S36. RP-HPLC profile of ON6 when Fmoc is deprotected with a DMF solution of 2% DBU and 5% piperazine, using RP HPLC on a C18 column (Supelco Discovery BIO Wide Pore C18-5) with a linear gradient from 0 to 50% of buffer B in buffer A over 45 min at 25 °C. Buffer (A): 50 mM triethylammonium acetate (TEAA), pH 6.5; buffer (B): 50 mM TEAA, pH 6.5 in H<sub>2</sub>O-CH<sub>3</sub>CN (1:1 v/v).

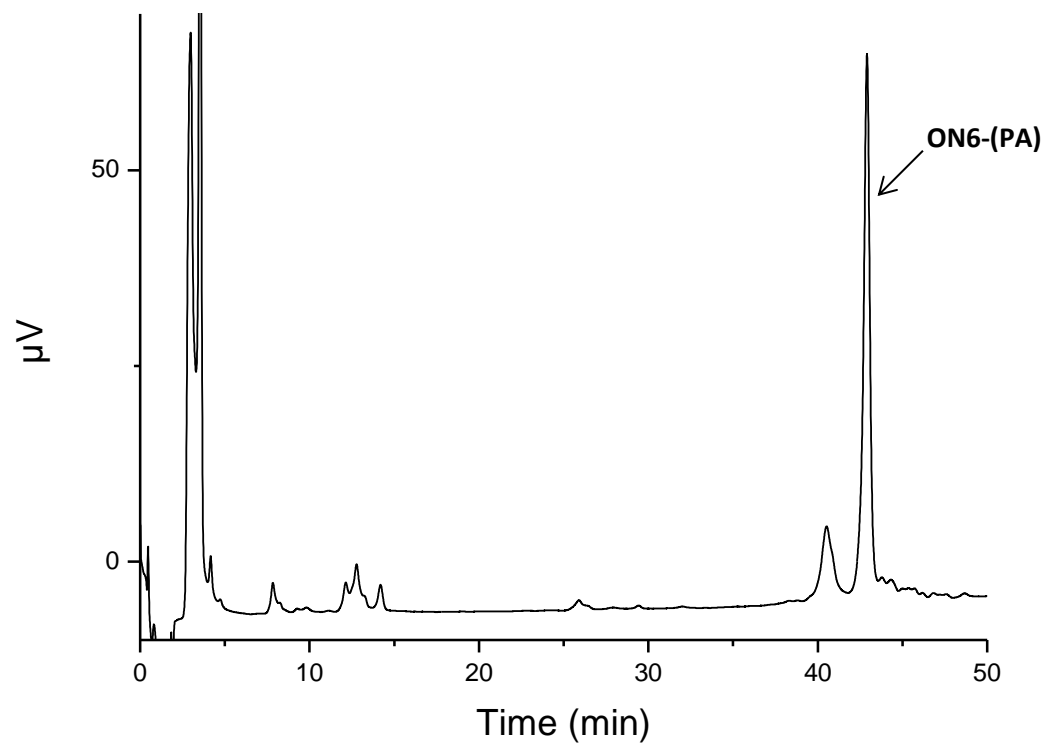

Figure S37. RP-HPLC profile of ON6-(PA) using RP HPLC on a C18 column (Supelco Discovery BIO Wide Pore C18-5) with a linear gradient from 50 to 100% of buffer B in buffer A over 45 min at 25 °C. Buffer (A): 50 mM triethylammonium acetate (TEAA), pH 6.5; buffer (B): 50 mM TEAA, pH 6.5 in H<sub>2</sub>O-CH<sub>3</sub>CN (1:1 v/v).



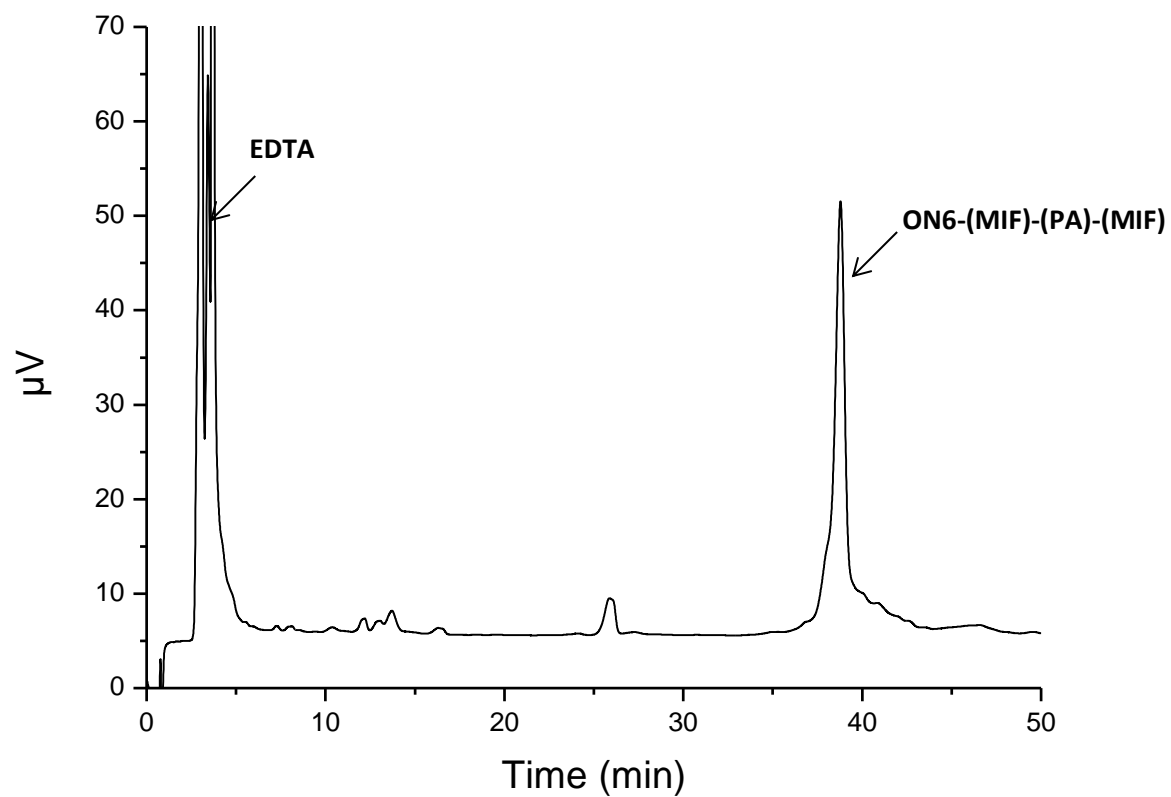

Figure S38. RP-HPLC profile of ON6-(MIF)-(PA)-(MIF) using RP HPLC on C18 column (Supelco Discovery BIO Wide Pore C18-5) with a linear gradient from 50 to 100% of buffer B in buffer A over 45 min at 25 °C. Buffer (A): 50 mM triethylammonium acetate (TEAA), pH 6.5; buffer (B): 50 mM TEAA, pH 6.5 in H<sub>2</sub>O-CH<sub>3</sub>CN (1:1 v/v).

Table S1. Yields of ON conjugation and total yields of ON conjugates.

| ON                    | Sequence 5' → 3' <sup>a</sup>                                           | Yield of conjugation <sup>b</sup> , (%) | Total yield <sup>c</sup> , (%) |
|-----------------------|-------------------------------------------------------------------------|-----------------------------------------|--------------------------------|
| ON1-(BG) <sub>4</sub> | (BG-L) <sub>2</sub> -(BG-L) <sub>2</sub> -doubler-GCGTTGATGCAATTTCTATGC | 76                                      | 22                             |
| ON2-P4                | (P4-L)-G*G*C*C*A*A*A*C*C*U*C*G*G*C*U*U*A*C*C*U                          | 79                                      | 71                             |
| ON3-(P4) <sub>2</sub> | (P4-L)-(P4-L)-G*G*C*C*A*A*A*C*C*U*C*G*G*C*U*U*A*C*C*U                   | 59                                      | 44                             |
| ON4-(P4) <sub>3</sub> | (P4-L)-(P4-L)-(P4-L)-G*G*C*C*A*A*A*C*C*U*C*G*G*C*U*U*A*C*C*U            | 63                                      | 47                             |
| ON5-P4                | TCAAGGAAG-(P4-L)-ATGGCATTCT                                             | 40                                      | 34                             |
| ON6-(PA)              | L <sup>alkyne</sup> -(PA-L)-L <sup>alkyne</sup> -TCAAGGAAGATGGCATTCT    | 65 <sup>d</sup>                         | 26                             |
| ON6-(MIF)-(PA)-(MIF)  | (MIF-L)-(PA-L)-(MIF-L)-TCAAGGAAGATGGCATTCT                              | 65 <sup>e</sup>                         | 17                             |

<sup>a</sup>In all sequences A = 2'-deoxyadenosine, G = 2'-deoxyguanosine, C = 2'-deoxycytidine, T = thymidine, A = 2'-OMe-adenosine, G = 2'-OMe-guanosine, C = 2'-OMe-cytidine, U = 2'-OMe-uridine, \* = PS linkages. L = linker, BG = benzylguanine, MIF = (Ac)PLG, (N → C), P4 = LGAQSNF, PA = palmitic acid. <sup>b</sup>Yields are calculated for the conversion of linker-containing ONs to corresponding ON conjugates and are based on the HPLC profiles after cleavage of ONs from solid support and deprotection. <sup>c</sup>Yields are based on the HPLC profiles after cleavage of ONs from solid support and deprotection. <sup>d</sup>Yield is calculated for the attachment of palmitoyl moiety. <sup>e</sup>Yield is calculated for the attachment of two MIF moieties.
